# Supplementary material for: Pairing double hybrid functionals with a tailored basis set for an accurate thermochemistry of hydrocarbons
Source: Royal Society of Chemistry journal article supplement (doi:10.1039/d1ra04108h), 2021-01-01
Supplement: d1ra04108h1.pdf [file d1ra04108h1.pdf]

## Pairing double hybrid functionals with a tailored basis set for an accurate thermochemistry of hydrocarbons

Hanwei Li, Eric Brémond, Juan Carlos Sancho-García and Carlo Adamo\*

*Chimie ParisTech, PSL Research University, CNRS, Institute of Chemistry for Health and Life Sciences, F-75005 Paris, France, Université de Paris, ITODYS, CNRS, F-75006 Paris, France; Departamento de Química Física, Universidad de Alicante, E-03080 Alicante, Spain ; Institut Universitaire de France, 103 Boulevard Saint Michel, F-75005 Paris, France*

### SUPPLEMENTARY INFORMATION

**Table S1.** Optimized exponents of the DH-SVPD basis set. These exponents replace the corresponding exponents of the original Def2-SVPD basis set, which also reported for comparison. All other exponents are kept as in the original basis set

**Table S2.** Example input for Gaussian code, reporting the optimized DH-SVPD basis set for C and H atoms

**Table S3.** The binding energies( $\Delta E$ , kcal/mol) and errors ( $E_r$ , kcal/mol) of the dimers in the AAA groups ..... 4

**Table S4.** The binding energies( $\Delta E$ , kcal/mol) and errors ( $E_r$ , kcal/mol) of the dimers in the AAA groups obtained with the cc-pVTZ basis set..... 6

**Table S5.** The binding energies( $\Delta E$ , kcal/mol) and errors ( $E_r$ , kcal/mol) of the dimers in the ADIM6 datasets obtained with the DH-SVPD basis set. .... 8

**Table S6.** The binding energies( $\Delta E$ , kcal/mol) and errors ( $E_r$ , kcal/mol) of the dimers in the ADIM6 datasets obtained with the Def2-QZVP basis set. .... 9

**Table S8.** Reaction energies ( $\Delta E$ , kcal/mol) and errors ( $E_r$ , kcal/mol) for the IDHC5 set obtained with the Def2-TZVPP basis set..... 11

**Table S9.** Reaction energies ( $\Delta E$ , kcal/mol) and errors ( $E_r$ , kcal/mol) for the PAH5 set obtained with the DH-SVPD basis set..... 12

**Table S10.** Reaction energies ( $\Delta E$ , kcal/mol) and errors ( $E_r$ , kcal/mol) for the PAH5 set obtained with the cc-pVQZ basis set. .... 13

**Table S11.** Reaction energies ( $\Delta E$ , kcal/mol) and errors ( $E_r$ , kcal/mol) for the Cope set obtained with the DH-SVPD basis set..... 14

**Table S12.** Reaction energies ( $\Delta E$ , kcal/mol) and errors ( $E_r$ , kcal/mol) for the Cope set obtained with the Def2-TZVPP basis set..... 20

**Table S13.** DLPNO-CCSD(T) reaction energies (kcal/mol) for the IDHC5 dataset, computed with the aug-cc-pVTZ and aug-cc-pVQZ basis sets and extrapolated at complete basis set limit according to a two point extrapolation scheme ( $\alpha = 5.79$  and  $\beta = 3.05$ ).

Coordinates of the molecules of the IDHC5 dataset

**Table S1.** Optimized exponents of the DH-SVPD basis set. These exponents replace the corresponding exponents of the original Def2-SVPD basis

set,  
for  
the

| atom | function | def2-SVPD     | DH-SVPD      | function | def2-SVPD     | DH-SVPD       |
|------|----------|---------------|--------------|----------|---------------|---------------|
| H    | s        | 0.12194962000 | 0.4617867850 | p        | 0.11704099050 | 0.07913402419 |
| C    | p        | 0.15268613795 | 0.1508036550 | d        | 0.11713185140 | 0.3229294790  |

which are also reported  
comparison. All other  
exponents are kept as in  
original basis set.

**Table S2.** Example input for Gaussian code, reporting the optimized DH-SVPD basis set for C and H atoms

|                                                                                                                                                                                                                                                                                                                                                                                                                                                                                                                                                                                                                                                                                                                                                                                                                                                                                                                                                                                                                                                                                                                                                                                                                                                                                                                                                                                                                                                                                                                                                                                  |                                                          |
|----------------------------------------------------------------------------------------------------------------------------------------------------------------------------------------------------------------------------------------------------------------------------------------------------------------------------------------------------------------------------------------------------------------------------------------------------------------------------------------------------------------------------------------------------------------------------------------------------------------------------------------------------------------------------------------------------------------------------------------------------------------------------------------------------------------------------------------------------------------------------------------------------------------------------------------------------------------------------------------------------------------------------------------------------------------------------------------------------------------------------------------------------------------------------------------------------------------------------------------------------------------------------------------------------------------------------------------------------------------------------------------------------------------------------------------------------------------------------------------------------------------------------------------------------------------------------------|----------------------------------------------------------|
| <pre>#P PBEQIDH/gen  Oktane  0 1 C      -0.1614620000      4.4569880000      0.0000000000 C      -0.8313160000      3.0940090000      0.0000000000 C       0.1614620000      1.9436090000      0.0000000000 C      -0.4965940000      0.5746890000      0.0000000000 C       0.4965940000     -0.5746890000      0.0000000000 C      -0.1614620000     -1.9436090000      0.0000000000 C       0.8313160000     -3.0940090000      0.0000000000 C       0.1614620000     -4.4569880000      0.0000000000 H      -0.8934560000      5.2668790000      0.0000000000 H       0.4730940000      4.5827170000      0.8810000000 H       0.4730940000      4.5827170000     -0.8810000000 H      -1.4849260000      3.0045060000     -0.8745100000 H      -1.4849260000      3.0045060000      0.8745100000 H       0.8165870000      2.0315690000     -0.8750300000 H       0.8165870000      2.0315690000      0.8750300000 H      -1.1515520000      0.4875230000     -0.8750580000 H      -1.1515520000      0.4875230000      0.8750580000 H       1.1515520000     -0.4875230000     -0.8750580000 H       1.1515520000     -0.4875230000      0.8750580000 H      -0.8165870000     -2.0315690000     -0.8750300000 H      -0.8165870000     -2.0315690000      0.8750300000 H       1.4849260000     -3.0045060000     -0.8745100000 H       1.4849260000     -3.0045060000      0.8745100000 H      -0.4730940000     -4.5827170000     -0.8810000000 H       0.8934560000     -5.2668790000      0.0000000000 H      -0.4730940000     -4.5827170000      0.8810000000</pre> |                                                          |
| <pre>-H  0 s  3 1.00    13.010701000      0.19682158000e-01    1.9622572000      0.13796524000    0.44453796000      0.47831935000 p  1 1.00    0.80000000000      1.0000000</pre>                                                                                                                                                                                                                                                                                                                                                                                                                                                                                                                                                                                                                                                                                                                                                                                                                                                                                                                                                                                                                                                                                                                                                                                                                                                                                                                                                                                               | Standard def2-SVPD exponents and coefficients for H atom |
| <pre>s  1 1.00    0.4617867850E+00  0.1000000000E+01 p  1 1.00    0.7913402419E-01  0.1000000000E+01 ****</pre>                                                                                                                                                                                                                                                                                                                                                                                                                                                                                                                                                                                                                                                                                                                                                                                                                                                                                                                                                                                                                                                                                                                                                                                                                                                                                                                                                                                                                                                                  | DH-SVPD optimized exponents for H atom                   |
| <pre>-C  0 s  5 1.00    1238.4016938      0.54568832082e-02    186.29004992      0.40638409211e-01    42.251176346      0.18025593888    11.676557932      0.46315121755    3.5930506482      0.44087173314 s  1 1.00    0.40245147363      1.0000000 s  1 1.00    0.13090182668      1.0000000 s  1 1.00    0.67053540256e-01  1.0000000 p  3 1.00    9.4680970621      0.38387871728e-01    2.0103545142      0.21117025112    0.54771004707      0.51328172114 d  1 1.00    0.80000000000      1.0000000</pre>                                                                                                                                                                                                                                                                                                                                                                                                                                                                                                                                                                                                                                                                                                                                                                                                                                                                                                                                                                                                                                                                | Standard def2-SVPD exponents and coefficients for C atom |
| <pre>p  1 1.00    0.1508036550E+00  0.1000000000E+01 d  1 1.00    0.3229294790E+00  0.1000000000E+01</pre>                                                                                                                                                                                                                                                                                                                                                                                                                                                                                                                                                                                                                                                                                                                                                                                                                                                                                                                                                                                                                                                                                                                                                                                                                                                                                                                                                                                                                                                                       | DH-SVPD optimized exponents for C atom                   |

**Table S3.** The binding energies( $\Delta E$ , kcal/mol) and errors ( $E_r$ , kcal/mol) of the dimers in the AAA groups

| Functional | PBEQIDH    |       | PBEQIDHD3(0) |       | PBEQIDHD3(BJ) |       | PBE0DH     |       | PBE0DHD3(BJ) |       | B2PLYP     |       | B2PLYPD3(0) |       | DSDPBEP86  |       | revDSDPBEP86D3(BJ) |       |
|------------|------------|-------|--------------|-------|---------------|-------|------------|-------|--------------|-------|------------|-------|-------------|-------|------------|-------|--------------------|-------|
|            | $\Delta E$ | $E_r$ | $\Delta E$   | $E_r$ | $\Delta E$    | $E_r$ | $\Delta E$ | $E_r$ | $\Delta E$   | $E_r$ | $\Delta E$ | $E_r$ | $\Delta E$  | $E_r$ | $\Delta E$ | $E_r$ | $\Delta E$         | $E_r$ |
| Butane     | -3.07      | -0.26 | -4.40        | -1.58 | -3.66         | -0.84 | -2.21      | 0.61  | -4.80        | -1.98 | -2.42      | 0.40  | -4.81       | -1.99 | -3.13      | -0.31 | -4.80              | -1.98 |
| Butene.    | -2.32      | 0.00  | -3.35        | -1.02 | -3.10         | -0.78 | -1.64      | 0.69  | -3.64        | -1.32 | -1.67      | 0.66  | -3.61       | -1.29 | -2.60      | -0.28 | -3.64              | -1.32 |
| Butyne.    | -3.32      | 0.11  | -4.34        | -0.92 | -4.13         | -0.71 | -2.62      | 0.81  | -4.56        | -1.14 | -2.60      | 0.83  | -4.41       | -0.99 | -2.70      | 0.72  | -4.56              | -1.14 |
| Ethane     | -1.47      | -0.09 | -2.09        | -0.70 | -1.85         | -0.46 | -1.13      | 0.26  | -2.29        | -0.90 | -1.10      | 0.28  | -2.26       | -0.87 | -1.34      | 0.05  | -2.29              | -0.90 |
| Ethene     | -1.22      | 0.26  | -1.71        | -0.24 | -1.53         | -0.05 | -0.97      | 0.51  | -1.83        | -0.35 | -0.83      | 0.65  | -1.83       | -0.35 | -1.00      | 0.47  | -1.83              | -0.35 |
| Ethyne.    | -1.68      | -0.15 | -1.88        | -0.36 | -1.85         | -0.33 | -1.56      | -0.04 | -1.95        | -0.42 | -1.44      | 0.09  | -1.92       | -0.39 | -0.55      | 0.97  | -1.95              | -0.42 |
| Hexane.    | -4.84      | -0.33 | -6.94        | -2.43 | -6.39         | -1.89 | -3.37      | 1.13  | -7.58        | -3.07 | -3.85      | 0.66  | -7.69       | -3.18 | -5.12      | -0.61 | -7.58              | -3.07 |
| Methane    | -0.59      | -0.06 | -0.79        | -0.26 | -0.71         | -0.18 | -0.50      | 0.03  | -0.87        | -0.34 | -0.47      | 0.06  | -0.82       | -0.29 | -0.42      | 0.11  | -0.87              | -0.34 |
| Pentane    | -3.96      | -0.30 | -5.66        | -2.00 | -5.19         | -1.53 | -2.82      | 0.84  | -6.20        | -2.54 | -3.19      | 0.47  | -6.27       | -2.61 | -4.06      | -0.40 | -6.20              | -2.54 |
| Pentene.   | -3.37      | -0.20 | -4.74        | -1.57 | -4.46         | -1.29 | -2.36      | 0.81  | -5.09        | -1.92 | -2.54      | 0.63  | -5.02       | -1.85 | -3.66      | -0.49 | -5.09              | -1.92 |
| Pentyne    | -4.25      | 0.20  | -5.62        | -1.17 | -5.35         | -0.90 | -3.21      | 1.24  | -5.91        | -1.46 | -3.18      | 1.27  | -5.81       | -1.36 | -3.82      | 0.63  | -5.91              | -1.46 |
| Propane    | -2.19      | -0.18 | -3.10        | -1.09 | -2.80         | -0.79 | -1.64      | 0.37  | -3.41        | -1.40 | -1.76      | 0.25  | -3.39       | -1.39 | -2.10      | -0.09 | -3.41              | -1.40 |
| Propene.   | -2.39      | -0.18 | -3.24        | -1.02 | -2.98         | -0.77 | -1.82      | 0.40  | -3.36        | -1.15 | -1.71      | 0.50  | -3.22       | -1.01 | -2.07      | 0.14  | -3.36              | -1.15 |
| Propyne    | -2.60      | -0.26 | -3.11        | -0.76 | -3.03         | -0.69 | -2.30      | 0.05  | -3.23        | -0.89 | -2.16      | 0.18  | -3.25       | -0.91 | -1.44      | 0.91  | -3.23              | -0.89 |
| MAD        | 0.18       |       | 1.08         |       | 0.80          |       | 0.56       |       | 1.11         |       | 0.49       |       | 1.32        |       | 0.44       |       | 1.35               |       |

| Functional | M06L       |       | TPSSh      |      | B3LYP      |      | PBE0       |      | M06        |       | CAM-B3LYP  |      | wB97XD     |       | B3LYP-D3   |       |
|------------|------------|-------|------------|------|------------|------|------------|------|------------|-------|------------|------|------------|-------|------------|-------|
|            | $\Delta E$ | Er    | $\Delta E$ | Er   | $\Delta E$ | Er   | $\Delta E$ | Er   | $\Delta E$ | Er    | $\Delta E$ | Er   | $\Delta E$ | Er    | $\Delta E$ | Er    |
| Butane     | -4.86      | -2.04 | -1.22      | 1.60 | -1.26      | 1.56 | -1.75      | 1.07 | -4.91      | -2.09 | -1.82      | 0.99 | -5.79      | -2.97 | -5.19      | -2.37 |
| Butene.    | -3.24      | -0.92 | -0.80      | 1.52 | -0.68      | 1.64 | -1.25      | 1.08 | -3.42      | -1.10 | -1.17      | 1.15 | -4.13      | -1.81 | -3.87      | -1.55 |
| Butyne.    | -4.13      | -0.70 | -1.66      | 1.76 | -1.46      | 1.96 | -2.26      | 1.16 | -4.60      | -1.17 | -2.12      | 1.31 | -5.05      | -1.63 | -4.63      | -1.21 |
| Ethane     | -2.03      | -0.64 | -0.73      | 0.66 | -0.61      | 0.78 | -0.92      | 0.47 | -1.92      | -0.53 | -0.93      | 0.45 | -2.63      | -1.24 | -2.45      | -1.06 |
| Ethene     | -1.44      | 0.04  | -0.51      | 0.96 | -0.45      | 1.03 | -0.82      | 0.65 | -1.55      | -0.07 | -0.74      | 0.74 | -2.04      | -0.56 | -2.04      | -0.56 |
| Ethyne.    | -1.19      | 0.34  | -1.22      | 0.31 | -1.13      | 0.40 | -1.52      | 0.01 | -1.44      | 0.09  | -1.44      | 0.08 | -1.88      | -0.35 | -2.03      | -0.50 |
| Hexane.    | -7.95      | -3.44 | -1.73      | 2.77 | -1.48      | 3.02 | -2.56      | 1.95 | -8.09      | -3.58 | -2.71      | 1.79 | -9.25      | -4.74 | -8.23      | -3.72 |
| Methane    | -0.61      | -0.08 | -0.35      | 0.18 | -0.38      | 0.15 | -0.47      | 0.06 | -0.52      | 0.01  | -0.44      | 0.09 | -0.88      | -0.35 | -0.88      | -0.35 |
| Pentane    | -6.31      | -2.65 | -1.50      | 2.17 | -1.28      | 2.38 | -2.20      | 1.46 | -6.46      | -2.80 | -2.32      | 1.34 | -7.50      | -3.84 | -6.75      | -3.09 |
| Pentene.   | -4.69      | -1.52 | -1.24      | 1.93 | -1.00      | 2.17 | -1.81      | 1.36 | -4.93      | -1.76 | -1.79      | 1.38 | -5.72      | -2.55 | -5.29      | -2.12 |
| Pentyne    | -5.52      | -1.07 | -1.81      | 2.64 | -1.55      | 2.90 | -2.59      | 1.86 | -5.87      | -1.42 | -2.40      | 2.05 | -6.54      | -2.09 | -5.97      | -1.52 |
| Propane    | -3.38      | -1.37 | -0.94      | 1.07 | -0.96      | 1.05 | -1.35      | 0.66 | -3.31      | -1.30 | -1.39      | 0.62 | -4.02      | -2.01 | -3.71      | -1.70 |
| Propene.   | -2.94      | -0.73 | -0.93      | 1.28 | -0.71      | 1.50 | -1.46      | 0.76 | -3.06      | -0.85 | -1.35      | 0.87 | -3.72      | -1.51 | -3.39      | -1.18 |
| Propyne    | -2.54      | -0.20 | -1.60      | 0.74 | -1.46      | 0.88 | -2.15      | 0.20 | -2.80      | -0.46 | -1.98      | 0.36 | -3.41      | -1.06 | -3.46      | -1.11 |
| MAD        | 1.12       |       | 1.40       |      | 1.53       |      | 0.91       |      | 1.23       |       | 0.95       |      | 1.91       |       | 1.57       |       |

**Table S4.** The binding energies( $\Delta E$ , kcal/mol) and errors (Er, kcal/mol) of the dimers in the AAA groups obtained with the cc-pVTZ basis set.

| Functional | PBEQIDH    |      | PBEQIDHD3(0) |       | PBEQIDHD3(BJ) |       | PBE0DH     |      | PBE0DHD3(BJ) |       | B2PLYP     |      | B2PLYPD3(0) |       | DSDPBEP86  |       | revDSDPBEP86 |       |
|------------|------------|------|--------------|-------|---------------|-------|------------|------|--------------|-------|------------|------|-------------|-------|------------|-------|--------------|-------|
|            | $\Delta E$ | Er   | $\Delta E$   | Er    | $\Delta E$    | Er    | $\Delta E$ | Er   | $\Delta E$   | Er    | $\Delta E$ | Er   | $\Delta E$  | Er    | $\Delta E$ | Er    | $\Delta E$   | Er    |
| Butane     | -1.28      | 1.54 | -2.56        | 0.26  | -2.18         | 0.64  | -0.70      | 2.12 | -2.73        | 0.09  | -0.55      | 2.27 | -2.78       | 0.04  | -2.98      | -0.16 | -2.61        | 0.21  |
| Butene.    | -1.34      | 0.99 | -2.28        | 0.04  | -2.03         | 0.30  | -0.90      | 1.43 | -2.47        | -0.15 | -0.74      | 1.58 | -2.45       | -0.13 | -2.65      | -0.33 | -2.33        | 0.00  |
| Butyne.    | -2.33      | 1.09 | -3.32        | 0.10  | -3.12         | 0.31  | -1.78      | 1.64 | -3.62        | -0.19 | -1.59      | 1.84 | -3.41       | 0.02  | -3.76      | -0.33 | -3.40        | 0.02  |
| Ethane     | -0.57      | 0.82 | -1.17        | 0.22  | -0.93         | 0.46  | -0.35      | 1.04 | -1.26        | 0.13  | -0.20      | 1.19 | -1.25       | 0.14  | -1.37      | 0.02  | -1.21        | 0.18  |
| Ethene     | -0.97      | 0.51 | -1.47        | 0.01  | -1.29         | 0.19  | -0.74      | 0.74 | -1.61        | -0.14 | -0.58      | 0.90 | -1.62       | -0.14 | -1.71      | -0.23 | -1.54        | -0.07 |
| Ethyne.    | -1.41      | 0.12 | -1.61        | -0.09 | -1.59         | -0.06 | -1.33      | 0.20 | -1.79        | -0.27 | -1.15      | 0.37 | -1.65       | -0.12 | -1.73      | -0.21 | -1.64        | -0.11 |
| Hexane.    | -2.11      | 2.40 | -4.16        | 0.35  | -3.63         | 0.88  | -1.11      | 3.39 | -4.42        | 0.09  | -0.96      | 3.55 | -4.60       | -0.09 | -4.82      | -0.32 | -4.22        | 0.28  |
| Methane    | -0.20      | 0.33 | -0.38        | 0.15  | -0.30         | 0.23  | -0.15      | 0.38 | 2.77         | 3.30  | -0.05      | 0.48 | -0.37       | 0.16  | -0.54      | -0.01 | -0.38        | 0.15  |
| Pentane    | -1.67      | 1.99 | -3.34        | 0.32  | -2.87         | 0.79  | -0.90      | 2.76 | -3.55        | 0.11  | -0.74      | 2.92 | -3.68       | -0.01 | -3.88      | -0.22 | -3.40        | 0.26  |
| Pentene.   | -1.81      | 1.36 | -3.09        | 0.08  | -2.83         | 0.34  | -1.17      | 2.00 | -3.33        | -0.16 | -1.02      | 2.15 | -3.23       | -0.06 | -3.56      | -0.39 | -3.15        | 0.02  |
| Pentyne    | -2.90      | 1.55 | -4.25        | 0.20  | -3.98         | 0.47  | -2.11      | 2.34 | -4.59        | -0.14 | -1.90      | 2.55 | -4.47       | -0.02 | -4.85      | -0.40 | -4.37        | 0.08  |
| Propane    | -0.84      | 1.16 | -1.75        | 0.25  | -1.46         | 0.55  | -0.48      | 1.52 | -1.89        | 0.12  | -0.34      | 1.67 | -1.89       | 0.11  | -2.06      | -0.05 | -1.80        | 0.20  |
| Propene.   | -1.45      | 0.77 | -2.27        | -0.06 | -2.02         | 0.19  | -1.05      | 1.16 | -2.43        | -0.21 | -0.84      | 1.37 | -2.25       | -0.04 | -2.53      | -0.31 | -2.27        | -0.06 |
| Propyne    | -1.93      | 0.41 | -2.44        | -0.10 | -2.36         | -0.01 | -1.70      | 0.65 | -2.72        | -0.38 | -1.45      | 0.90 | -2.53       | -0.19 | -2.65      | -0.31 | -2.44        | -0.10 |
| MAD        |            | 1.07 |              | 0.16  |               | 0.39  |            | 1.53 |              | 0.39  |            | 1.69 |             | 0.09  |            | 0.23  |              | 0.13  |

| Functional | M06L       |       | TPSSh      |      | B3LYP      |      | PBE0       |      | M06        |       | CAM-B3LYP  |      | wB97XD     |       | B3LYP-D3   |       |
|------------|------------|-------|------------|------|------------|------|------------|------|------------|-------|------------|------|------------|-------|------------|-------|
|            | $\Delta E$ | Er    | $\Delta E$ | Er   | $\Delta E$ | Er   | $\Delta E$ | Er   | $\Delta E$ | Er    | $\Delta E$ | Er   | $\Delta E$ | Er    | $\Delta E$ | Er    |
| Butane     | -3.19      | -0.37 | -0.23      | 2.59 | 0.00       | 2.82 | -0.42      | 2.40 | -3.42      | -0.60 | -0.19      | 2.63 | -4.15      | -1.33 | -3.37      | -0.55 |
| Butene.    | -2.46      | -0.14 | -0.48      | 1.84 | -0.18      | 2.15 | -0.76      | 1.56 | -2.66      | -0.34 | -0.48      | 1.84 | -3.19      | -0.86 | -2.82      | -0.50 |
| Butyne.    | -3.36      | 0.07  | -1.05      | 2.38 | -0.76      | 2.66 | -1.50      | 1.92 | -3.45      | -0.03 | -1.23      | 2.19 | -4.13      | -0.70 | -3.81      | -0.38 |
| Ethane     | -1.16      | 0.23  | -0.15      | 1.24 | 0.00       | 1.39 | -0.25      | 1.13 | -1.08      | 0.31  | -0.16      | 1.22 | -1.15      | 0.24  | -1.04      | 0.35  |
| Ethene     | -1.26      | 0.22  | -0.35      | 1.12 | -0.07      | 1.40 | -0.62      | 0.86 | -1.32      | 0.16  | -0.51      | 0.97 | -1.82      | -0.35 | -1.81      | -0.34 |
| Ethyne.    | -1.07      | 0.45  | -1.03      | 0.50 | -0.88      | 0.65 | -1.30      | 0.22 | -1.12      | 0.40  | -1.14      | 0.39 | -1.57      | -0.05 | -1.79      | -0.26 |
| Hexane.    | -5.39      | -0.89 | -0.29      | 4.22 | 0.00       | 4.50 | -0.60      | 3.90 | -5.88      | -1.38 | 0.00       | 4.50 | -5.79      | -1.28 | -5.47      | -0.97 |
| Methane    | -0.41      | 0.12  | -0.10      | 0.43 | 0.00       | 0.53 | -0.15      | 0.38 | -0.15      | 0.38  | 0.00       | 0.53 | -0.57      | -0.04 | -0.57      | -0.04 |
| Pentane    | -4.40      | -0.74 | -0.26      | 3.41 | -0.01      | 3.66 | -0.52      | 3.14 | -4.57      | -0.91 | 0.00       | 3.66 | -4.46      | -0.80 | -4.42      | -0.76 |
| Pentene.   | -3.45      | -0.28 | -0.49      | 2.68 | -0.15      | 3.02 | -0.84      | 2.33 | -3.67      | -0.50 | -0.51      | 2.66 | -4.39      | -1.22 | -3.87      | -0.70 |
| Pentyne    | -4.51      | -0.06 | -1.12      | 3.33 | -0.50      | 3.95 | -1.68      | 2.77 | -4.58      | -0.13 | -1.11      | 3.34 | -4.98      | -0.53 | -4.39      | 0.06  |
| Propane    | -2.16      | -0.15 | -0.16      | 1.85 | 0.00       | 2.01 | -0.31      | 1.70 | -2.19      | -0.18 | 0.00       | 2.01 | -2.78      | -0.77 | -2.23      | -0.23 |
| Propene.   | -2.18      | 0.03  | -0.49      | 1.72 | -0.18      | 2.03 | -0.83      | 1.38 | -2.22      | -0.01 | -0.60      | 1.62 | -2.88      | -0.66 | -2.58      | -0.37 |
| Propyne    | -1.82      | 0.53  | -1.11      | 1.24 | -0.87      | 1.48 | -1.59      | 0.75 | -1.92      | 0.43  | -1.33      | 1.02 | -2.76      | -0.41 | -2.82      | -0.47 |
| MAD        |            | 0.30  |            | 2.04 |            | 2.30 |            | 1.75 |            | 0.41  |            | 2.04 |            | 0.66  |            | 0.43  |

**Table S5.** The binding energies( $\Delta E$ , kcal/mol) and errors ( $E_r$ , kcal/mol) of the dimers in the ADIM6 datasets obtained with the DH-SVPD basis set.

|      | Functional | PBEQIDH    |       | PBE-QIDH-D3(0) |       | PBE-QIDH-D3(BJ) |       | PBE0DH     |       | PBE0DH-D3(BJ) |       | B2PLYP     |       | B2PLYP-D3(0) |       | DSDPBEP86  |       | revDSDPBEP86D3(BJ) |       |
|------|------------|------------|-------|----------------|-------|-----------------|-------|------------|-------|---------------|-------|------------|-------|--------------|-------|------------|-------|--------------------|-------|
|      |            | $\Delta E$ | $E_r$ | $\Delta E$     | $E_r$ | $\Delta E$      | $E_r$ | $\Delta E$ | $E_r$ | $\Delta E$    | $E_r$ | $\Delta E$ | $E_r$ | $\Delta E$   | $E_r$ | $\Delta E$ | $E_r$ | $\Delta E$         | $E_r$ |
| AM2. | AD2.       | 1.47       | 0.13  | 2.05           | 0.71  | 1.83            | 0.49  | 1.12       | -0.22 | 2.05          | 0.71  | 1.10       | -0.24 | 2.12         | 0.78  | 1.00       | 1.00  | 2.22               | 0.88  |
| AM3. | AD3.       | 2.11       | 0.12  | 2.98           | 0.99  | 2.72            | 0.73  | 1.51       | -0.48 | 2.97          | 0.98  | 1.58       | -0.41 | 3.19         | 1.20  | 1.45       | 1.45  | 3.24               | 1.25  |
| AM4. | AD4.       | 3.05       | 0.16  | 4.35           | 1.46  | 3.97            | 1.08  | 2.13       | -0.76 | 4.29          | 1.40  | 2.33       | -0.56 | 4.65         | 1.76  | 2.12       | 2.12  | 4.72               | 1.83  |
| AM5. | AD5.       | 3.96       | 0.18  | 5.64           | 1.86  | 5.18            | 1.40  | 2.72       | -1.06 | 5.54          | 1.76  | 3.05       | -0.73 | 6.12         | 2.34  | 2.74       | 2.74  | 6.13               | 2.35  |
| AM6. | AD6.       | 4.77       | 0.17  | 6.87           | 2.27  | 6.32            | 1.72  | 3.21       | -1.39 | 6.75          | 2.15  | 3.64       | -0.96 | 7.47         | 2.87  | 3.35       | 3.35  | 7.46               | 2.86  |
| AM7. | AD7.       | 5.69       | 0.14  | 8.12           | 2.57  | 7.55            | 2.00  | 3.73       | -1.82 | 7.97          | 2.42  | 4.24       | -1.31 | 8.95         | 3.40  | 3.87       | 3.87  | 8.82               | 3.27  |
|      | MAD        |            | 0.15  |                | 1.64  |                 | 1.24  |            | 0.95  |               | 1.57  |            | 0.70  |              | 2.06  |            | 2.42  |                    | 2.07  |

| Functional |      | M06L       |       | TPSSH      |       | B3LYP      |       | PBE0       |       | M06        |       | CAM-B3LYP  |       | wB97XD     |       | B3LYP-D3   |       |
|------------|------|------------|-------|------------|-------|------------|-------|------------|-------|------------|-------|------------|-------|------------|-------|------------|-------|
|            |      | $\Delta E$ | $E_r$ |
| AM2.       | AD2. | 1.91       | 0.57  | 0.34       | -1.00 | 0.25       | -1.09 | 0.89       | -0.45 | 1.68       | 0.34  | 0.93       | -0.41 | 2.36       | 1.02  | 0.97       | 0.97  |
| AM3.       | AD3. | 3.12       | 1.13  | 0.30       | -1.69 | 0.26       | -1.73 | 1.09       | -0.90 | 2.99       | 1.00  | 1.18       | -0.81 | 3.58       | 1.59  | 1.46       | 1.46  |
| AM4.       | AD4. | 4.54       | 1.65  | 0.36       | -2.53 | 0.41       | -2.48 | 1.50       | -1.39 | 4.39       | 1.50  | 1.67       | -1.22 | 5.29       | 2.40  | 2.16       | 2.16  |
| AM5.       | AD5. | 5.91       | 2.13  | 0.37       | -3.41 | 0.52       | -3.26 | 1.86       | -1.92 | 5.87       | 2.09  | 2.14       | -1.64 | 6.91       | 3.13  | 2.83       | 2.83  |
| AM6.       | AD6. | 7.38       | 2.78  | 0.30       | -4.30 | 0.50       | -4.10 | 2.11       | -2.49 | 7.32       | 2.72  | 2.45       | -2.15 | 8.57       | 3.97  | 3.46       | 3.46  |
| AM7.       | AD7. | 8.98       | 3.43  | 0.10       | -5.45 | 0.35       | -5.20 | 2.29       | -3.26 | 9.05       | 3.50  | 2.73       | -2.82 | 10.26      | 4.71  | 3.96       | 3.96  |
|            | MAD  |            | 1.95  |            | 3.07  |            | 2.98  |            | 1.74  |            | 1.86  |            | 1.51  |            | 2.80  |            | 2.47  |



**Table S6.** The binding energies( $\Delta E$ , kcal/mol) and errors ( $E_r$ , kcal/mol) of the dimers in the ADIM6 datasets obtained with the Def2-QZVP basis set.

|      | Functional | PBEQIDH    |       | PBE-QIDH-D3(0) |       | PBE-QIDH-D3(BJ) |       | PBE0DH     |       | PBE0DH-D3(BJ) |       | B2PLYP     |       | B2PLYP-D3(0) |       | DSDPBEP86  |       | revDSDPBEP86D3(BJ) |       |
|------|------------|------------|-------|----------------|-------|-----------------|-------|------------|-------|---------------|-------|------------|-------|--------------|-------|------------|-------|--------------------|-------|
|      |            | $\Delta E$ | $E_r$ | $\Delta E$     | $E_r$ | $\Delta E$      | $E_r$ | $\Delta E$ | $E_r$ | $\Delta E$    | $E_r$ | $\Delta E$ | $E_r$ | $\Delta E$   | $E_r$ | $\Delta E$ | $E_r$ | $\Delta E$         | $E_r$ |
| AM2. | AD2.       | 0.60       | -0.74 | 1.19           | -0.15 | 0.96            | -0.38 | 0.31       | -1.03 | 1.24          | -0.10 | 0.16       | -1.18 | 1.19         | -0.15 | 0.02       | 0.02  | 1.21               | -0.13 |
| AM3. | AD3.       | 0.88       | -1.11 | 1.75           | -0.24 | 1.49            | -0.50 | 0.39       | -1.60 | 1.85          | -0.14 | 0.26       | -1.73 | 1.87         | -0.12 | 0.04       | 0.04  | 1.79               | -0.20 |
| AM4. | AD4.       | 1.27       | -1.62 | 2.57           | -0.32 | 2.19            | -0.70 | 0.52       | -2.37 | 2.68          | -0.21 | 0.38       | -2.51 | 2.70         | -0.19 | 0.07       | 0.07  | 2.61               | -0.28 |
| AM5. | AD5.       | 1.68       | -2.10 | 3.36           | -0.42 | 2.90            | -0.88 | 0.68       | -3.10 | 3.50          | -0.28 | 0.53       | -3.25 | 3.61         | -0.17 | 0.09       | 0.09  | 3.41               | -0.37 |
| AM6. | AD6.       | 2.04       | -2.56 | 4.14           | -0.46 | 3.59            | -1.01 | 0.77       | -3.83 | 4.31          | -0.29 | 0.63       | -3.97 | 4.45         | -0.15 | 0.17       | 0.17  | 4.20               | -0.40 |
| AM7. | AD7.       | 2.52       | -3.03 | 4.95           | -0.60 | 4.39            | -1.16 | 0.94       | -4.61 | 5.18          | -0.37 | 0.76       | -4.79 | 5.48         | -0.07 | 0.17       | 0.17  | 5.02               | -0.53 |
|      | MAD        |            | 1.86  |                | 0.37  |                 | 0.77  |            | 2.76  |               | 0.23  |            | 2.90  |              | 0.14  |            | 0.09  |                    | 0.32  |

| Functional |      | M06L       |       | TPSSh      |       | B3LYP      |       | PBE0       |       | M06        |       | CAM-B3LYP  |       | wB97XD     |       | B3LYP-D3   |       |
|------------|------|------------|-------|------------|-------|------------|-------|------------|-------|------------|-------|------------|-------|------------|-------|------------|-------|
|            |      | $\Delta E$ | $E_r$ |
| AM2.       | AD2. | 1.24       | -0.10 | -0.38      | -1.72 | -0.63      | -1.97 | 0.12       | -1.22 | 0.97       | -0.37 | 0.03       | -1.31 | 1.57       | 0.23  | 0.09       | 0.09  |
| AM3.       | AD3. | 2.03       | 0.04  | -0.67      | -2.66 | -0.96      | -2.95 | 0.04       | -1.95 | 1.92       | -0.07 | -0.07      | -2.06 | 2.48       | 0.49  | 0.25       | 0.25  |
| AM4.       | AD4. | 3.03       | 0.14  | -1.05      | -3.94 | -1.39      | -4.28 | -0.03      | -2.92 | 2.87       | -0.02 | -0.15      | -3.04 | 3.70       | 0.81  | 0.36       | 0.36  |
| AM5.       | AD5. | 3.93       | 0.15  | -1.42      | -5.20 | -1.79      | -5.57 | -0.07      | -3.85 | 3.90       | 0.12  | -0.20      | -3.98 | 4.91       | 1.13  | 0.52       | 0.52  |
| AM6.       | AD6. | 4.98       | 0.38  | -1.83      | -6.43 | -2.27      | -6.87 | -0.20      | -4.80 | 4.96       | 0.36  | -0.34      | -4.94 | 6.17       | 1.57  | 0.69       | 0.69  |
| AM7.       | AD7. | 6.05       | 0.50  | -2.30      | -7.85 | -2.77      | -8.32 | -0.30      | -5.85 | 6.27       | 0.72  | -0.43      | -5.98 | 7.52       | 1.97  | 0.84       | 0.84  |
|            | MAD  |            | 0.22  |            | 4.64  |            | 4.99  |            | 3.43  |            | 0.28  |            | 3.55  |            | 1.03  |            | 0.46  |

**Table S7.** Reaction energies ( $\Delta E$ , kcal/mol) and errors ( $E_r$ , kcal/mol) for the IDHC5 set obtained with the DH-SVPD basis set.

| Functional | PBEQIDH    |       | PBEQIDHD3(0) |       | PBEQIDHD3(BJ) |       | PBE0DH     |       | PBE0DHD3(BJ) |       | B2PLYP     |       | B2PLYPD3(0) |       | DSDPBEP86  |       | revDSDPBEP86D3(BJ) |       |
|------------|------------|-------|--------------|-------|---------------|-------|------------|-------|--------------|-------|------------|-------|-------------|-------|------------|-------|--------------------|-------|
|            | $\Delta E$ | $E_r$ | $\Delta E$   | $E_r$ | $\Delta E$    | $E_r$ | $\Delta E$ | $E_r$ | $\Delta E$   | $E_r$ | $\Delta E$ | $E_r$ | $\Delta E$  | $E_r$ | $\Delta E$ | $E_r$ | $\Delta E$         | $E_r$ |
| Reaction1  | -0.97      | 0.36  | -1.96        | -0.63 | -1.82         | -0.49 | 1.66       | 3.00  | -1.68        | -0.35 | 1.77       | 3.10  | -1.31       | 0.02  | -3.24      | -1.91 | -2.43              | -1.10 |
| Reaction2  | 9.94       | 0.94  | 8.00         | -1.00 | 8.09          | -0.91 | 14.63      | 5.64  | 8.17         | -0.83 | 14.88      | 5.89  | 9.18        | 0.19  | 5.57       | -3.43 | 7.04               | -1.96 |
| Reaction3  | 3.52       | 0.09  | 2.59         | -0.85 | 2.63          | -0.81 | 4.48       | 1.04  | 2.43         | -1.00 | 4.40       | 0.96  | 2.38        | -1.06 | 2.00       | -1.43 | 2.31               | -1.12 |
| Reaction4  | 1.97       | 1.64  | -1.92        | -2.25 | -1.19         | -1.52 | 5.80       | 5.47  | -2.27        | -2.60 | 5.97       | 5.64  | -2.91       | -3.23 | -3.80      | -4.13 | -2.41              | -2.74 |
| Reaction5  | -0.62      | 2.32  | -6.31        | -3.38 | -5.29         | -2.35 | 5.02       | 7.96  | -6.71        | -3.77 | 5.21       | 8.15  | -7.81       | -4.87 | -8.99      | -6.05 | -6.95              | -4.02 |
| MAD        |            | 1.07  |              | 1.62  |               | 1.21  |            | 4.62  |              | 1.71  |            | 4.75  |             | 1.87  |            | 3.39  |                    | 2.19  |

| Functional | M06L       |       | TPSSH      |       | B3LYP      |       | PBE0       |       | M06        |       | CAM-B3LYP  |       | wB97XD     |        | B3LYP-D3   |       |
|------------|------------|-------|------------|-------|------------|-------|------------|-------|------------|-------|------------|-------|------------|--------|------------|-------|
|            | $\Delta E$ | $E_r$  | $\Delta E$ | $E_r$ |
| Reaction1  | -1.34      | 0.00  | 5.36       | 6.69  | 6.50       | 7.83  | 3.87       | 5.20  | -3.53      | -2.20 | 3.67       | 5.01  | -0.50      | 0.84   | 0.84       | 2.17  |
| Reaction2  | 7.58       | -1.42 | 20.06      | 11.06 | 23.42      | 14.42 | 18.48      | 9.48  | 6.23       | -2.76 | 18.59      | 9.59  | 9.92       | 0.92   | 12.86      | 3.86  |
| Reaction3  | 1.31       | -2.13 | 5.77       | 2.33  | 6.20       | 2.77  | 5.21       | 1.78  | 1.62       | -1.82 | 5.22       | 1.79  | 1.52       | -1.92  | 2.42       | -1.02 |
| Reaction4  | -6.65      | -6.98 | 12.74      | 12.41 | 13.51      | 13.18 | 9.13       | 8.80  | -5.60      | -5.93 | 8.53       | 8.20  | -6.88      | -7.20  | -3.12      | -3.45 |
| Reaction5  | -12.63     | -9.69 | 15.40      | 18.34 | 16.29      | 19.23 | 9.98       | 12.92 | -11.29     | -8.35 | 9.04       | 11.98 | -13.35     | -10.41 | -8.07      | -5.13 |
| MAD        |            | 4.04  |            | 10.17 |            | 11.49 |            | 7.64  |            | 4.21  |            | 7.31  |            | 4.26   |            | 3.13  |

**Table S8.** Reaction energies ( $\Delta E$ , kcal/mol) and errors (Er, kcal/mol) for the IDHC5 set obtained with the Def2-TZVPP basis set.

| Functional | PBEQIDH    |      | PBEQIDHD3(0) |      | PBEQIDHD3(BJ) |      | PBE0DH     |       | PBE0DHD3(BJ) |      | B2PLYP     |       | B2PLYPD3(0) |      | DSDPBEP86  |       | revDSDPBEP86D3BJ |      |
|------------|------------|------|--------------|------|---------------|------|------------|-------|--------------|------|------------|-------|-------------|------|------------|-------|------------------|------|
|            | $\Delta E$ | Er   | $\Delta E$   | Er   | $\Delta E$    | Er   | $\Delta E$ | Er    | $\Delta E$   | Er   | $\Delta E$ | Er    | $\Delta E$  | Er   | $\Delta E$ | Er    | $\Delta E$       | Er   |
| Reaction1  | 0.16       | 1.50 | -0.82        | 0.51 | -0.69         | 0.64 | 2.69       | 4.02  | -0.65        | 0.68 | 3.20       | 4.53  | 0.26        | 1.59 | -1.87      | -0.54 | -1.01            | 0.32 |
| Reaction2  | 11.86      | 2.86 | 9.92         | 0.92 | 10.01         | 1.02 | 16.41      | 7.41  | 9.94         | 0.95 | 17.40      | 8.40  | 11.91       | 2.91 | 7.91       | -1.08 | 9.48             | 0.48 |
| Reaction3  | 4.59       | 1.16 | 3.66         | 0.22 | 3.70          | 0.27 | 5.48       | 2.05  | 3.43         | 0.00 | 5.60       | 2.17  | 3.58        | 0.14 | 3.20       | -0.23 | 3.54             | 0.11 |
| Reaction4  | 5.51       | 5.18 | 1.62         | 1.29 | 2.34          | 2.02 | 9.18       | 8.85  | 1.11         | 0.78 | 9.90       | 9.57  | 1.22        | 0.89 | 0.21       | -0.12 | 1.72             | 1.39 |
| Reaction5  | 4.62       | 7.56 | -1.08        | 1.86 | -0.05         | 2.89 | 9.96       | 12.90 | -1.77        | 1.17 | 11.00      | 13.94 | -1.75       | 1.19 | -3.03      | -0.09 | -0.82            | 2.12 |
| MAD        |            | 3.65 |              | 0.96 |               | 1.37 |            | 7.05  |              | 0.72 |            | 7.72  |             | 1.34 |            | 0.41  |                  | 0.88 |

| Functional | M06L       |       | TPSSh      |       | B3LYP      |       | PBE0       |       | M06        |       | CAM-B3LYP  |       | wB97XD     |       | B3LYP-D3   |      |
|------------|------------|-------|------------|-------|------------|-------|------------|-------|------------|-------|------------|-------|------------|-------|------------|------|
|            | $\Delta E$ | Er    | $\Delta E$ | Er   |
| Reaction1  | -0.12      | 1.21  | 6.23       | 7.56  | 8.39       | 9.72  | 4.95       | 6.28  | -2.37      | -1.04 | 5.39       | 6.73  | 0.91       | 2.24  | 2.73       | 4.06 |
| Reaction2  | 9.65       | 0.66  | 21.46      | 12.46 | 26.74      | 17.74 | 20.34      | 11.35 | 8.47       | -0.53 | 21.67      | 12.67 | 12.35      | 3.35  | 16.18      | 7.18 |
| Reaction3  | 2.54       | -0.90 | 6.64       | 3.21  | 7.40       | 3.96  | 6.19       | 2.76  | 2.54       | -0.89 | 6.41       | 2.97  | 2.51       | -0.92 | 3.61       | 0.18 |
| Reaction4  | -2.62      | -2.94 | 15.84      | 15.51 | 17.80      | 17.47 | 12.48      | 12.15 | -2.68      | -3.01 | 12.70      | 12.37 | -3.37      | -3.70 | 1.16       | 0.84 |
| Reaction5  | -6.75      | -3.81 | 19.90      | 22.84 | 22.48      | 25.41 | 14.81      | 17.75 | -7.16      | -4.22 | 15.05      | 17.99 | -8.30      | -5.36 | -1.89      | 1.05 |
| MAD        |            | 1.90  |            | 12.32 |            | 14.86 |            | 10.06 |            | 1.94  |            | 10.55 |            | 3.11  |            | 2.66 |

**Table S9.** Reaction energies ( $\Delta E$ , kcal/mol) and errors (Er, kcal/mol) for the PAH5 set obtained with the DH-SVPD basis set.

| Functionals | PBEQIDH    |      | PBEQIDHD3(0) |      | PBEQIDHD3(BJ) |      | PBE0DH     |      | PBE0DHD3(BJ) |      | B2PLYP     |      | B2PLYPD3(0) |      | DSDPBEP86  |      | revDSDPBEP86D3(BJ) |      |
|-------------|------------|------|--------------|------|---------------|------|------------|------|--------------|------|------------|------|-------------|------|------------|------|--------------------|------|
|             | $\Delta E$ | Er   | $\Delta E$   | Er   | $\Delta E$    | Er   | $\Delta E$ | Er   | $\Delta E$   | Er   | $\Delta E$ | Er   | $\Delta E$  | Er   | $\Delta E$ | Er   | $\Delta E$         | Er   |
|             | 6.41       | 0.41 | 6.46         | 0.46 | 6.50          | 0.51 | 6.17       | 0.17 | 6.42         | 0.42 | 5.59       | 0.41 | 5.71        | 0.29 | 6.01       | 0.01 | 5.84               | 0.16 |
|             | 0.53       | 0.02 | 0.60         | 0.10 | 0.67          | 0.17 | 0.27       | 0.23 | 0.59         | 0.09 | -0.04      | 0.54 | 0.08        | 0.42 | 0.43       | 0.08 | 0.28               | 0.22 |
|             | 3.61       | 0.24 | 3.73         | 0.36 | 3.84          | 0.47 | 3.11       | 0.26 | 3.69         | 0.32 | 2.51       | 0.86 | 2.73        | 0.64 | 3.35       | 0.02 | 3.06               | 0.31 |
|             | 6.11       | 0.14 | 6.06         | 0.08 | 6.11          | 0.13 | 6.23       | 0.25 | 6.22         | 0.25 | 5.69       | 0.29 | 5.50        | 0.48 | 5.61       | 0.36 | 5.55               | 0.43 |
|             | 13.56      | 0.89 | 13.75        | 1.08 | 13.90         | 1.24 | 12.80      | 0.13 | 13.65        | 0.99 | 11.30      | 1.37 | 11.65       | 1.02 | 12.66      | 0.01 | 12.19              | 0.48 |
| MAD         |            | 0.34 |              | 0.42 |               | 0.50 |            | 0.21 |              | 0.41 |            | 0.69 |             | 0.57 |            | 0.09 |                    | 0.32 |

| Functional | M06L       |       | TPSSh      |      | B3LYP      |      | PBE0       |       | M06        |      | CAM-B3LYP  |       | wB97XD     |       | B3LYP-D3   |      |
|------------|------------|-------|------------|------|------------|------|------------|-------|------------|------|------------|-------|------------|-------|------------|------|
|            | $\Delta E$ | Er    | $\Delta E$ | Er   | $\Delta E$ | Er   | $\Delta E$ | Er    | $\Delta E$ | Er   | $\Delta E$ | Er    | $\Delta E$ | Er    | $\Delta E$ | Er   |
| Reaction1  | 5.44       | 0.56  | 5.20       | 0.80 | 5.10       | 0.90 | 5.63       | 0.37  | 5.75       | 0.25 | 6.29       | -0.29 | 6.68       | -0.68 | 5.33       | 0.67 |
| Reaction2  | 0.01       | 0.49  | -0.26      | 0.77 | -0.56      | 1.07 | -0.11      | 0.61  | 0.12       | 0.38 | 0.35       | 0.15  | 0.89       | -0.39 | -0.30      | 0.80 |
| Reaction3  | 2.63       | 0.74  | 2.02       | 1.35 | 1.51       | 1.86 | 2.36       | 1.01  | 2.62       | 0.75 | 3.06       | 0.31  | 3.92       | -0.55 | 1.98       | 1.39 |
| Reaction4  | 6.05       | -0.08 | 5.82       | 0.15 | 5.79       | 0.19 | 6.00       | -0.02 | 5.89       | 0.09 | 6.83       | -0.85 | 6.64       | -0.66 | 5.47       | 0.51 |
| Reaction5  | 10.97      | 1.70  | 10.25      | 2.42 | 9.75       | 2.92 | 11.27      | 1.40  | 11.69      | 0.98 | 13.08      | -0.41 | 14.35      | -1.69 | 10.48      | 2.18 |
| MAD        | 0.71       |       | 1.10       |      | 1.38       |      | 0.68       |       | 0.49       |      | 0.40       |       | 0.79       |       | 1.11       |      |

**Table S10.** Reaction energies ( $\Delta E$ , kcal/mol) and errors ( $E_r$ , kcal/mol) for the PAH5 set obtained with the cc-pVQZ basis set.

| Functional | PBEQIDH    |       | PBEQIDHD3(0) |       | PBEQIDHD3(BJ) |       | PBE0DH     |       | PBE0DHD3(BJ) |       | revDSDPBEP86D3(BJ) |       |
|------------|------------|-------|--------------|-------|---------------|-------|------------|-------|--------------|-------|--------------------|-------|
|            | $\Delta E$ | $E_r$ | $\Delta E$   | $E_r$ | $\Delta E$    | $E_r$ | $\Delta E$ | $E_r$ | $\Delta E$   | $E_r$ | $\Delta E$         | $E_r$ |
|            | 6.39       | -0.39 | 6.44         | -0.44 | 6.49          | -0.49 | 6.15       | -0.15 | 6.40         | -0.40 | 5.83               | 0.17  |
|            | 0.43       | 0.07  | 0.51         | -0.01 | 0.57          | -0.07 | 0.17       | 0.33  | 6.20         | -5.70 | 0.18               | 0.32  |
|            | 3.48       | -0.11 | 3.61         | -0.24 | 3.72          | -0.35 | 2.96       | 0.41  | 3.54         | -0.17 | 2.95               | 0.42  |
|            | 6.23       | -0.26 | 6.18         | -0.20 | 6.22          | -0.25 | 6.21       | -0.24 | 6.20         | -0.23 | 5.72               | 0.25  |
|            | 13.39      | -0.72 | 13.58        | -0.91 | 13.74         | -1.07 | 12.61      | 0.05  | 13.47        | -0.80 | 12.03              | 0.64  |
| MAD        |            | 0.31  |              | 0.36  |               | 0.45  |            | 0.24  |              | 1.46  |                    | 0.36  |

**Table S11.** Reaction energies ( $\Delta E$ , kcal/mol) and errors ( $Er$ , kcal/mol) for the Cope set obtained with the DH-SVPD basis set.

|     | Functionals             | PBEQIDH         |       |          |                   |       | PBEQIDHD3(0)      |       |       |                   |       | PBEQIDHD3(BJ)   |                   |       |                   |          |       |       |
|-----|-------------------------|-----------------|-------|----------|-------------------|-------|-------------------|-------|-------|-------------------|-------|-----------------|-------------------|-------|-------------------|----------|-------|-------|
|     |                         | Barrier Heights |       |          | Reaction Energies |       | Barrier Heights   |       |       | Reaction Energies |       | Barrier Heights |                   |       | Reaction Energies |          |       |       |
|     |                         | $\Delta E$      | $Er$  |          | $\Delta E_r$      | $Er$  | $\Delta E$        | $Er$  |       | $\Delta E$        | $Er$  | $\Delta E$      | $Er$              |       | $\Delta E$        | $Er$     |       |       |
| H   | <b>TS</b>               | 16.32           | -1.21 |          |                   |       | TS                | 16.26 | -1.15 |                   |       |                 | TS                | 16.24 | -1.12             |          |       |       |
| CH3 | <b>TS<sub>1-2</sub></b> | 15.64           | 1.12  | <b>2</b> | -0.28             | -0.28 | TS <sub>1-2</sub> | 15.59 | 1.07  | <b>2</b>          | -0.27 | -0.26           | TS <sub>1-2</sub> | 15.57 | 1.05              | <b>2</b> | -0.26 | -0.26 |
|     | <b>TS<sub>2-3</sub></b> | 15.96           | -0.59 | <b>3</b> | -1.55             | -0.68 | TS <sub>2-3</sub> | 15.93 | -0.56 | <b>3</b>          | -1.47 | -0.61           | TS <sub>2-3</sub> | 15.91 | -0.54             | <b>3</b> | -1.50 | -0.63 |
|     | <b>TS<sub>3-4</sub></b> | 14.53           | -0.53 | <b>4</b> | -1.26             | -0.59 | TS <sub>3-4</sub> | 14.56 | -0.56 | <b>4</b>          | -1.16 | -0.49           | TS <sub>3-4</sub> | 14.51 | -0.50             | <b>4</b> | -1.19 | -0.52 |
| NH3 | <b>TS<sub>1-2</sub></b> | 14.87           | 0.85  | <b>2</b> | -1.08             | 0.62  | TS <sub>1-2</sub> | 14.81 | 0.78  | <b>2</b>          | -1.09 | 0.64            | TS <sub>1-2</sub> | 14.81 | 0.78              | <b>2</b> | -1.06 | 0.61  |
|     | <b>TS<sub>2-3</sub></b> | 11.40           | 0.11  | <b>3</b> | -5.37             | 1.56  | TS <sub>2-3</sub> | 11.37 | 0.14  | <b>3</b>          | -5.31 | 1.50            | TS <sub>2-3</sub> | 11.39 | 0.12              | <b>3</b> | -5.34 | 1.53  |
|     | <b>TS<sub>3-4</sub></b> | 10.54           | 0.26  | <b>4</b> | -4.58             | 1.22  | TS <sub>3-4</sub> | 10.56 | 0.24  | <b>4</b>          | -4.49 | 1.13            | TS <sub>3-4</sub> | 10.50 | 0.30              | <b>4</b> | -4.53 | 1.17  |
| CN  | <b>TS<sub>1-2</sub></b> | 16.45           | -1.08 | <b>2</b> | -2.88             | 0.56  | TS <sub>1-2</sub> | 16.39 | -1.02 | <b>2</b>          | -2.87 | 0.55            | TS <sub>1-2</sub> | 16.38 | -1.01             | <b>2</b> | -2.86 | 0.54  |
|     | <b>TS<sub>2-3</sub></b> | 10.09           | -0.25 | <b>3</b> | -6.19             | 1.09  | TS <sub>2-3</sub> | 10.07 | -0.22 | <b>3</b>          | -6.13 | 1.03            | TS <sub>2-3</sub> | 10.05 | -0.21             | <b>3</b> | -6.14 | 1.04  |
|     | <b>TS<sub>3-4</sub></b> | 11.33           | -0.36 | <b>4</b> | -5.05             | 0.88  | TS <sub>3-4</sub> | 11.34 | -0.36 | <b>4</b>          | -4.99 | 0.81            | TS <sub>3-4</sub> | 11.31 | -0.33             | <b>4</b> | -4.98 | 0.81  |
| OH  | <b>TS<sub>1-2</sub></b> | 17.30           | 1.47  | <b>2</b> | 0.86              | 0.50  | TS <sub>1-2</sub> | 17.26 | 1.42  | <b>2</b>          | 0.85  | 0.52            | TS <sub>1-2</sub> | 17.23 | 1.40              | <b>2</b> | 0.87  | 0.50  |
|     | <b>TS<sub>2-3</sub></b> | 15.25           | 0.22  | <b>3</b> | -1.92             | 1.11  | TS <sub>2-3</sub> | 15.20 | 0.17  | <b>3</b>          | -1.89 | 1.08            | TS <sub>2-3</sub> | 15.22 | 0.19              | <b>3</b> | -1.91 | 1.10  |
|     | <b>TS<sub>3-4</sub></b> | 14.09           | 0.12  | <b>4</b> | -3.94             | 1.08  | TS <sub>3-4</sub> | 14.08 | 0.11  | <b>4</b>          | -3.87 | 1.01            | TS <sub>3-4</sub> | 14.03 | 0.07              | <b>4</b> | -3.91 | 1.05  |
| MAD |                         |                 | 0.63  |          |                   | 0.85  |                   |       | 0.60  |                   |       | 0.80            |                   |       | 0.59              |          |       | 0.81  |

|       | PBE0DH          |       |   |                   |       |       | PBE0DHD3(BJ)    |       |   |                   |       |       | B2PLYP          |       |   |                   |       |
|-------|-----------------|-------|---|-------------------|-------|-------|-----------------|-------|---|-------------------|-------|-------|-----------------|-------|---|-------------------|-------|
|       | Barrier Heights |       |   | Reaction Energies |       |       | Barrier Heights |       |   | Reaction Energies |       |       | Barrier Heights |       |   | Reaction Energies |       |
|       | $\Delta E$      | Er    |   | $\Delta E$        | Er    |       | $\Delta E$      | Er    |   | $\Delta E$        | Er    |       | $\Delta E$      | Er    |   | $\Delta E$        | Er    |
| TS    | 17.49           | -2.38 |   |                   |       | TS    | 17.13           | -2.02 |   |                   |       | TS    | 12.68           | 2.43  |   |                   |       |
| TS1-2 | 16.85           | 2.33  | 2 | -0.43             | -0.42 | TS1-2 | 16.56           | 2.04  | 2 | -0.29             | -0.28 | TS1-2 | 11.99           | -2.53 | 2 | -0.38             | -0.37 |
| TS2-3 | 16.82           | -1.45 | 3 | -2.01             | -1.14 | TS2-3 | 16.68           | -1.31 | 3 | -1.71             | -0.84 | TS2-3 | 12.21           | 3.16  | 3 | -1.70             | -0.84 |
| TS3-4 | 15.22           | -1.21 | 4 | -1.73             | -1.06 | TS3-4 | 15.20           | -1.20 | 4 | -1.34             | -0.68 | TS3-4 | 10.68           | 3.33  | 4 | -1.47             | -0.80 |
| TS1-2 | 16.05           | 2.02  | 2 | -1.21             | 0.75  | TS1-2 | 15.78           | 1.75  | 2 | -1.10             | 0.65  | TS1-2 | 11.32           | 2.70  | 2 | -1.03             | 0.57  |
| TS2-3 | 11.81           | 0.29  | 3 | -5.94             | 2.13  | TS2-3 | 11.86           | 0.35  | 3 | -5.72             | 1.91  | TS2-3 | 8.17            | 3.34  | 3 | -5.38             | 1.57  |
| TS3-4 | 11.11           | 0.31  | 4 | -5.13             | 1.77  | TS3-4 | 11.03           | 0.24  | 4 | -4.84             | 1.48  | TS3-4 | 6.87            | 3.93  | 4 | -4.65             | 1.29  |
| TS1-2 | 17.65           | -2.28 | 2 | -3.05             | 0.73  | TS1-2 | 17.37           | -2.00 | 2 | -2.94             | 0.62  | TS1-2 | 12.80           | 2.57  | 2 | -2.98             | 0.66  |
| TS2-3 | 10.67           | -0.83 | 3 | -6.67             | 1.56  | TS2-3 | 10.59           | -0.75 | 3 | -6.41             | 1.30  | TS2-3 | 6.25            | 3.60  | 3 | -6.60             | 1.49  |
| TS3-4 | 12.01           | -1.04 | 4 | -5.51             | 1.34  | TS3-4 | 11.95           | -0.97 | 4 | -5.18             | 1.01  | TS3-4 | 7.20            | 3.78  | 4 | -5.41             | 1.23  |
| TS1-2 | 18.43           | 2.59  | 2 | 0.74              | 0.62  | TS1-2 | 18.15           | 2.31  | 2 | 0.81              | 0.56  | TS1-2 | 13.60           | 2.23  | 2 | 0.96              | 0.40  |
| TS2-3 | 15.83           | 0.80  | 3 | -2.39             | 1.58  | TS2-3 | 15.78           | 0.75  | 3 | -2.28             | 1.47  | TS2-3 | 12.14           | 2.89  | 3 | -1.65             | 0.84  |
| TS3-4 | 14.76           | 0.80  | 4 | -4.34             | 1.48  | TS3-4 | 14.57           | 0.60  | 4 | -4.17             | 1.31  | TS3-4 | 10.75           | 3.21  | 4 | -3.63             | 0.77  |
| MAD   |                 | 1.41  |   |                   | 1.22  |       |                 | 1.25  |   |                   | 1.01  |       |                 | 3.05  |   |                   | 0.90  |

|       | B2PLYPD3(0)     |       |   |                   |       | DSDPBEP86 |                 |       |   |                   | revDSDPBEP86-D3(BJ) |       |                 |       |   |                   |       |
|-------|-----------------|-------|---|-------------------|-------|-----------|-----------------|-------|---|-------------------|---------------------|-------|-----------------|-------|---|-------------------|-------|
|       | Barrier Heights |       |   | Reaction Energies |       |           | Barrier Heights |       |   | Reaction Energies |                     |       | Barrier Heights |       |   | Reaction Energies |       |
|       | $\Delta E$      | Er    |   | $\Delta E$        | Er    |           | $\Delta E$      | Er    |   | $\Delta E$        | Er                  |       | $\Delta E$      | Er    |   | $\Delta E$        | Er    |
| TS    | 12.39           | 2.72  |   |                   |       | TS        | 14.12           | 0.99  |   |                   |                     | TS    | 14.97           | 0.15  |   |                   |       |
| TS1-2 | 11.78           | -2.74 | 2 | -0.19             | -0.18 | TS1-2     | 13.49           | -1.03 | 2 | -0.13             | -0.12               | TS1-2 | 14.33           | -0.19 | 2 | -0.18             | -0.17 |
| TS2-3 | 12.23           | 3.14  | 3 | -1.30             | -0.43 | TS2-3     | 14.08           | 1.29  | 3 | -1.09             | -0.22               | TS2-3 | 14.87           | 0.50  | 3 | -1.14             | -0.28 |
| TS3-4 | 10.83           | 3.18  | 4 | -1.01             | -0.34 | TS3-4     | 12.80           | 1.21  | 4 | -0.80             | -0.13               | TS3-4 | 13.58           | 0.43  | 4 | -0.87             | -0.21 |
| TS1-2 | 11.08           | -2.95 | 2 | -0.92             | -0.46 | TS1-2     | 12.80           | -1.23 | 2 | -0.85             | -0.39               | TS1-2 | 13.64           | -0.39 | 2 | -0.86             | -0.40 |
| TS2-3 | 8.19            | -3.33 | 3 | -5.06             | -1.25 | TS2-3     | 10.09           | -1.43 | 3 | -4.68             | -0.87               | TS2-3 | 10.73           | -0.78 | 3 | -4.60             | -0.79 |
| TS3-4 | 6.95            | -3.85 | 4 | -4.27             | -0.91 | TS3-4     | 9.05            | -1.75 | 4 | -3.95             | -0.59               | TS3-4 | 9.94            | -0.85 | 4 | -3.91             | -0.56 |
| TS1-2 | 12.55           | 2.82  | 2 | -2.90             | 0.58  | TS1-2     | 14.30           | 1.07  | 2 | -2.65             | 0.33                | TS1-2 | 15.14           | 0.23  | 2 | -2.62             | 0.30  |
| TS2-3 | 6.12            | 3.72  | 3 | -6.44             | 1.33  | TS2-3     | 8.40            | 1.44  | 3 | -5.74             | 0.63                | TS2-3 | 9.18            | 0.66  | 3 | -5.65             | 0.54  |
| TS3-4 | 7.10            | 3.88  | 4 | -5.20             | 1.02  | TS3-4     | 9.51            | 1.47  | 4 | -4.61             | 0.44                | TS3-4 | 10.39           | 0.59  | 4 | -4.58             | 0.41  |
| TS1-2 | 13.38           | -2.45 | 2 | 1.00              | 0.37  | TS1-2     | 15.10           | -0.74 | 2 | 1.01              | 0.36                | TS1-2 | 15.88           | 0.04  | 2 | 0.98              | 0.38  |
| TS2-3 | 12.11           | -2.93 | 3 | -1.38             | 0.57  | TS2-3     | 13.75           | -1.28 | 3 | -1.37             | 0.56                | TS2-3 | 14.46           | -0.57 | 3 | -1.31             | 0.50  |
| TS3-4 | 10.79           | -3.18 | 4 | -3.29             | 0.44  | TS3-4     | 12.49           | -1.48 | 4 | -3.35             | 0.50                | TS3-4 | 13.37           | -0.60 | 4 | -3.30             | 0.44  |
|       |                 | 3.14  |   |                   | 0.66  |           |                 | 1.26  |   |                   | 0.43                |       |                 | 0.46  |   |                   | 0.41  |



|     | Functional | M06L            |       |   |                   |       | TPSSh           |       |       |                   |       | B3LYP           |       |       |                   |    |       |       |
|-----|------------|-----------------|-------|---|-------------------|-------|-----------------|-------|-------|-------------------|-------|-----------------|-------|-------|-------------------|----|-------|-------|
|     |            | Barrier Heights |       |   | Reaction Energies |       | Barrier Heights |       |       | Reaction Energies |       | Barrier Heights |       |       | Reaction Energies |    |       |       |
|     |            | $\Delta E$      | Er    |   | $\Delta E_r$      | Er    | $\Delta E$      | Er    |       | $\Delta E$        | Er    | $\Delta E$      | Er    |       | $\Delta E$        | Er |       |       |
| H   | TS         | 16.70           | -1.59 |   |                   |       | TS              | 13.90 | 1.21  |                   |       |                 | TS    | 13.58 | 1.53              |    |       |       |
| CH3 | TS1-2      | 16.16           | 1.64  | 2 | -0.52             | -0.52 | TS1-2           | 13.28 | -1.24 | 2                 | -0.76 | -0.75           | TS1-2 | 12.92 | -1.60             | 2  | -0.64 | -0.63 |
|     | TS2-3      | 15.31           | 0.06  | 3 | -2.57             | -1.70 | TS2-3           | 12.67 | 2.70  | 3                 | -2.68 | -1.81           | TS2-3 | 12.56 | 2.81              | 3  | -2.51 | -1.64 |
|     | TS3-4      | 13.91           | 0.10  | 4 | -2.12             | -1.46 | TS3-4           | 10.95 | 3.05  | 4                 | -2.39 | -1.73           | TS3-4 | 10.73 | 3.28              | 4  | -2.29 | -1.62 |
| NH3 | TS1-2      | 15.60           | 1.57  | 2 | -0.76             | 0.31  | TS1-2           | 12.61 | 1.42  | 2                 | -1.28 | 0.82            | TS1-2 | 12.22 | 1.81              | 2  | -1.29 | 0.83  |
|     | TS2-3      | 9.88            | 1.63  | 3 | -7.04             | 3.23  | TS2-3           | 8.20  | 3.32  | 3                 | -6.62 | 2.81            | TS2-3 | 7.96  | 3.56              | 3  | -6.40 | 2.59  |
|     | TS3-4      | 9.34            | 1.46  | 4 | -6.02             | 2.66  | TS3-4           | 6.88  | 3.91  | 4                 | -5.78 | 2.43            | TS3-4 | 6.72  | 4.08              | 4  | -5.63 | 2.27  |
| CN  | TS1-2      | 16.81           | -1.44 | 2 | -3.72             | 1.40  | TS1-2           | 14.00 | 1.37  | 2                 | -3.56 | 1.24            | TS1-2 | 13.72 | 1.65              | 2  | -3.34 | 1.02  |
|     | TS2-3      | 8.17            | 1.67  | 3 | -8.43             | 3.32  | TS2-3           | 6.12  | 3.72  | 3                 | -8.01 | 2.90            | TS2-3 | 6.13  | 3.71              | 3  | -7.55 | 2.44  |
|     | TS3-4      | 9.64            | 1.34  | 4 | -6.86             | 2.69  | TS3-4           | 7.17  | 3.81  | 4                 | -6.57 | 2.39            | TS3-4 | 7.13  | 3.85              | 4  | -6.28 | 2.11  |
| OH  | TS1-2      | 17.64           | 1.81  | 2 | 1.02              | 0.35  | TS1-2           | 14.86 | 0.98  | 2                 | 0.70  | 0.66            | TS1-2 | 14.42 | 1.41              | 2  | 0.77  | 0.60  |
|     | TS2-3      | 13.82           | 1.21  | 3 | -3.40             | 2.59  | TS2-3           | 12.09 | 2.94  | 3                 | -3.06 | 2.25            | TS2-3 | 12.27 | 2.76              | 3  | -2.38 | 1.57  |
|     | TS3-4      | 13.07           | 0.89  | 4 | -5.22             | 2.36  | TS3-4           | 10.58 | 3.38  | 4                 | -4.81 | 1.95            | TS3-4 | 10.89 | 3.08              | 4  | -4.22 | 1.36  |
| MAD |            |                 | 1.26  |   |                   | 1.88  |                 |       | 2.54  |                   |       | 1.81            |       |       | 2.70              |    |       | 1.56  |

|       | PBE0            |       |   |                   |       |       | M06             |       |   |                   |       |       | CAM-B3LYP       |       |   |                   |       |
|-------|-----------------|-------|---|-------------------|-------|-------|-----------------|-------|---|-------------------|-------|-------|-----------------|-------|---|-------------------|-------|
|       | Barrier Heights |       |   | Reaction Energies |       |       | Barrier Heights |       |   | Reaction Energies |       |       | Barrier Heights |       |   | Reaction Energies |       |
|       | $\Delta E$      | Er    |   | $\Delta E$        | Er    |       | $\Delta E$      | Er    |   | $\Delta E$        | Er    |       | $\Delta E$      | Er    |   | $\Delta E$        | Er    |
| TS    | 16.28           | -1.17 |   |                   |       | TS    | 18.26           | -3.15 |   |                   |       | TS    | 18.57           | -3.45 |   |                   |       |
| TS1-2 | 15.66           | 1.15  | 2 | -0.57             | -0.56 | TS1-2 | 17.74           | 3.23  | 2 | -0.06             | -0.05 | TS1-2 | 17.92           | 3.41  | 2 | -0.43             | -0.43 |
| TS2-3 | 15.28           | 0.09  | 3 | -2.45             | -1.58 | TS2-3 | 17.69           | -2.32 | 3 | -1.59             | -0.72 | TS2-3 | 17.93           | -2.56 | 3 | -2.02             | -1.16 |
| TS3-4 | 13.55           | 0.46  | 4 | -2.16             | -1.50 | TS3-4 | 16.44           | -2.43 | 4 | -1.29             | -0.63 | TS3-4 | 16.21           | -2.21 | 4 | -1.82             | -1.15 |
| TS1-2 | 14.88           | 0.85  | 2 | -1.34             | 0.88  | TS1-2 | 17.01           | 2.98  | 2 | -0.71             | 0.25  | TS1-2 | 17.16           | 3.13  | 2 | -1.14             | 0.68  |
| TS2-3 | 10.16           | 1.35  | 3 | -6.61             | 2.80  | TS2-3 | 12.19           | 0.68  | 3 | -5.58             | 1.77  | TS2-3 | 12.66           | 1.14  | 3 | -5.75             | 1.94  |
| TS3-4 | 9.23            | 1.56  | 4 | -5.76             | 2.40  | TS3-4 | 12.27           | 1.47  | 4 | -4.79             | 1.44  | TS3-4 | 12.29           | 1.49  | 4 | -5.04             | 1.68  |
| TS1-2 | 16.42           | -1.05 | 2 | -3.26             | 0.94  | TS1-2 | 18.47           | -3.10 | 2 | -3.03             | 0.71  | TS1-2 | 18.76           | -3.39 | 2 | -2.77             | 0.45  |
| TS2-3 | 8.96            | 0.88  | 3 | -7.35             | 2.24  | TS2-3 | 10.97           | -1.13 | 3 | -6.72             | 1.62  | TS2-3 | 11.93           | -2.09 | 3 | -6.24             | 1.14  |
| TS3-4 | 10.13           | 0.85  | 4 | -6.08             | 1.90  | TS3-4 | 12.73           | -1.75 | 4 | -5.53             | 1.35  | TS3-4 | 13.31           | -2.33 | 4 | -5.26             | 1.08  |
| TS1-2 | 17.19           | 1.36  | 2 | 0.62              | 0.75  | TS1-2 | 19.19           | 3.36  | 2 | 1.21              | 0.16  | TS1-2 | 19.42           | 3.58  | 2 | 0.96              | 0.40  |
| TS2-3 | 14.19           | 0.84  | 3 | -3.00             | 2.19  | TS2-3 | 16.27           | 1.24  | 3 | -1.98             | 1.17  | TS2-3 | 17.22           | 2.19  | 3 | -1.82             | 1.01  |
| TS3-4 | 12.97           | 1.00  | 4 | -4.80             | 1.94  | TS3-4 | 15.95           | 1.98  | 4 | -3.96             | 1.10  | TS3-4 | 16.34           | 2.37  | 4 | -3.71             | 0.85  |
| MAD   |                 | 0.97  |   |                   | 1.64  |       |                 | 2.22  |   |                   | 0.91  |       |                 | 2.57  |   |                   | 1.00  |

|       | wB97XD          |       |   |                   |       |       | B3LYP-D3        |       |   |                   |       |
|-------|-----------------|-------|---|-------------------|-------|-------|-----------------|-------|---|-------------------|-------|
|       | Barrier Heights |       |   | Reaction Energies |       |       | Barrier Heights |       |   | Reaction Energies |       |
|       | $\Delta E$      | Er    |   | $\Delta E$        | Er    |       | $\Delta E$      | Er    |   | $\Delta E$        | Er    |
| TS    | 18.26           | -3.15 |   |                   |       | TS    | 13.06           | 2.05  |   |                   |       |
| TS1-2 | 17.67           | 3.15  | 2 | -0.40             | -0.39 | TS1-2 | 12.52           | -2.00 | 2 | -0.33             | -0.33 |
| TS2-3 | 17.61           | -2.24 | 3 | -1.90             | -1.03 | TS2-3 | 12.56           | 2.81  | 3 | -1.83             | -0.96 |
| TS3-4 | 16.13           | -2.13 | 4 | -1.56             | -0.89 | TS3-4 | 10.96           | 3.04  | 4 | -1.47             | -0.80 |
| TS1-2 | 16.87           | 2.84  | 2 | -1.16             | 0.70  | TS1-2 | 11.77           | 2.26  | 2 | -1.12             | 0.66  |
| TS2-3 | 12.27           | 0.76  | 3 | -5.73             | 1.92  | TS2-3 | 7.96            | 3.56  | 3 | -5.85             | 2.04  |
| TS3-4 | 12.07           | 1.27  | 4 | -4.93             | 1.57  | TS3-4 | 6.85            | 3.95  | 4 | -4.95             | 1.59  |
| TS1-2 | 18.42           | -3.05 | 2 | -2.87             | 0.55  | TS1-2 | 13.26           | 2.11  | 2 | -3.23             | 0.91  |
| TS2-3 | 11.59           | -1.75 | 3 | -6.29             | 1.19  | TS2-3 | 5.87            | 3.97  | 3 | -7.27             | 2.17  |
| TS3-4 | 13.05           | -2.08 | 4 | -5.22             | 1.05  | TS3-4 | 6.94            | 4.03  | 4 | -5.91             | 1.74  |
| TS1-2 | 19.08           | 3.25  | 2 | 0.68              | 0.68  | TS1-2 | 14.03           | 1.80  | 2 | 0.82              | 0.55  |
| TS2-3 | 16.19           | 1.16  | 3 | -2.47             | 1.66  | TS2-3 | 12.17           | 2.86  | 3 | -1.93             | 1.12  |
| TS3-4 | 15.42           | 1.45  | 4 | -4.28             | 1.42  | TS3-4 | 10.92           | 3.05  | 4 | -3.62             | 0.76  |
| MAD   |                 | 2.18  |   |                   | 1.09  |       |                 | 2.88  |   |                   | 1.13  |

**Table S12.** Reaction energies ( $\Delta E$ , kcal/mol) and errors ( $E_r$ , kcal/mol) for the Cope set obtained with the Def2-TZVPP basis set.

|     | Functionals | PBEQIDH         |       |      |                   |       | PBEQIDHD3(0)    |       |       |                   |       | PBEQIDHD3(BJ)   |       |       |                   |       |       |       |
|-----|-------------|-----------------|-------|------|-------------------|-------|-----------------|-------|-------|-------------------|-------|-----------------|-------|-------|-------------------|-------|-------|-------|
|     |             | Barrier Heights |       |      | Reaction Energies |       | Barrier Heights |       |       | Reaction Energies |       | Barrier Heights |       |       | Reaction Energies |       |       |       |
|     |             | $\Delta E$      | $E_r$ |      | $\Delta E_r$      | $E_r$ | $\Delta E$      | $E_r$ |       | $\Delta E$        | $E_r$ | $\Delta E$      | $E_r$ |       | $\Delta E$        | $E_r$ |       |       |
| H   | TS          | 15.70           | -0.58 |      |                   |       | TS              | 15.63 | -0.52 |                   |       |                 | TS    | 15.61 | -0.50             |       |       |       |
| CH3 | TS1-2       | 15.06           | 0.54  | 2    | -0.10             | -0.10 | TS1-2           | 15.01 | 0.49  | 2                 | -0.09 | -0.08           | TS1-2 | 14.99 | 0.47              | 2     | -0.08 | -0.07 |
|     | TS2-3       | 15.50           | -0.13 | 3    | -1.44             | -0.57 | TS2-3           | 15.47 | -0.10 | 3                 | -1.37 | -0.50           | TS2-3 | 15.45 | -0.08             | 3     | -1.39 | -0.53 |
|     | TS3-4       | 14.01           | -0.01 | 4    | -1.19             | -0.52 | TS3-4           | 14.04 | -0.04 | 4                 | -1.08 | -0.41           | TS3-4 | 13.99 | 0.02              | 4     | -1.12 | -0.45 |
| NH3 | TS1-2       | 14.43           | 0.40  | 2    | -0.76             | 0.31  | TS1-2           | 14.36 | 0.34  | 2                 | -0.78 | 0.32            | TS1-2 | 14.36 | 0.34              | 2     | -0.75 | 0.29  |
|     | TS2-3       | 11.19           | 0.32  | 3    | -5.14             | 1.33  | TS2-3           | 11.17 | 0.35  | 3                 | -5.08 | 1.27            | TS2-3 | 11.19 | 0.33              | 3     | -5.11 | 1.30  |
|     | TS3-4       | 10.10           | 0.70  | 4    | -4.46             | 1.10  | TS3-4           | 10.12 | 0.68  | 4                 | -4.37 | 1.01            | TS3-4 | 10.06 | 0.74              | 4     | -4.41 | 1.05  |
| CN  | TS1-2       | 15.89           | -0.52 | 2    | -2.66             | 0.34  | TS1-2           | 15.84 | -0.47 | 2                 | -2.65 | 0.33            | TS1-2 | 15.83 | -0.46             | 2     | -2.65 | 0.32  |
|     | TS2-3       | 9.72            | 0.12  | 3    | -6.02             | 0.91  | TS2-3           | 9.69  | 0.15  | 3                 | -5.96 | 0.85            | TS2-3 | 9.68  | 0.16              | 3     | -5.97 | 0.86  |
|     | TS3-4       | 10.87           | 0.10  | 4    | -4.87             | 0.70  | TS3-4           | 10.88 | 0.10  | 4                 | -4.81 | 0.63            | TS3-4 | 10.85 | 0.13              | 4     | -4.80 | 0.63  |
| OH  | TS1-2       | 16.64           | 0.81  | 2    | 1.21              | 0.15  | TS1-2           | 16.60 | 0.76  | 2                 | 1.20  | 0.17            | TS1-2 | 16.57 | 0.74              | 2     | 1.22  | 0.15  |
|     | TS2-3       | 14.85           | 0.19  | 3    | -1.86             | 1.05  | TS2-3           | 14.80 | 0.23  | 3                 | -1.83 | 1.02            | TS2-3 | 14.82 | 0.21              | 3     | -1.85 | 1.04  |
|     | TS3-4       | 13.53           | 0.44  | 4    | -3.93             | 1.08  | TS3-4           | 13.52 | 0.45  | 4                 | -3.86 | 1.01            | TS3-4 | 13.47 | 0.49              | 4     | -3.91 | 1.05  |
| MAD |             |                 |       | 0.37 |                   |       |                 |       |       |                   | 0.36  |                 |       |       |                   |       |       | 0.65  |

|       | PBE0DH          |       |   |                   |       |       | PBE0DHD3(BJ)    |       |   |                   |       |       | B2PLYP          |       |   |                   |       |
|-------|-----------------|-------|---|-------------------|-------|-------|-----------------|-------|---|-------------------|-------|-------|-----------------|-------|---|-------------------|-------|
|       | Barrier Heights |       |   | Reaction Energies |       |       | Barrier Heights |       |   | Reaction Energies |       |       | Barrier Heights |       |   | Reaction Energies |       |
|       | $\Delta E$      | Er    |   | $\Delta E$        | Er    |       | $\Delta E$      | Er    |   | $\Delta E$        | Er    |       | $\Delta E$      | Er    |   | $\Delta E$        | Er    |
| TS    | 16.75           | -1.63 |   |                   |       | TS    | 16.38           | -1.27 |   |                   |       | TS    | 12.05           | 3.07  |   |                   |       |
| TS1-2 | 16.13           | 1.62  | 2 | -0.26             | -0.25 | TS1-2 | 15.84           | 1.33  | 2 | -0.12             | -0.12 | TS1-2 | 11.39           | -3.13 | 2 | -0.24             | -0.23 |
| TS2-3 | 16.25           | -0.88 | 3 | -1.88             | -1.01 | TS2-3 | 16.12           | -0.75 | 3 | -1.58             | -0.71 | TS2-3 | 11.69           | 3.68  | 3 | -1.64             | -0.78 |
| TS3-4 | 14.60           | -0.60 | 4 | -1.62             | -0.95 | TS3-4 | 14.59           | -0.58 | 4 | -1.24             | -0.57 | TS3-4 | 10.13           | 3.88  | 4 | -1.41             | -0.74 |
| TS1-2 | 15.47           | 1.44  | 2 | -0.94             | 0.48  | TS1-2 | 15.19           | 1.16  | 2 | -0.83             | 0.37  | TS1-2 | 10.87           | 3.16  | 2 | -0.71             | 0.25  |
| TS2-3 | 11.46           | 0.05  | 3 | -5.70             | 1.89  | TS2-3 | 11.52           | 0.01  | 3 | -5.48             | 1.67  | TS2-3 | 7.97            | 3.54  | 3 | -5.06             | 1.25  |
| TS3-4 | 10.57           | 0.23  | 4 | -4.98             | 1.63  | TS3-4 | 10.49           | 0.31  | 4 | -4.69             | 1.34  | TS3-4 | 6.54            | 4.26  | 4 | -4.40             | 1.05  |
| TS1-2 | 16.96           | -1.59 | 2 | -2.86             | 0.53  | TS1-2 | 16.69           | -1.32 | 2 | -2.74             | 0.42  | TS1-2 | 12.22           | 3.15  | 2 | -2.86             | 0.54  |
| TS2-3 | 10.18           | -0.33 | 3 | -6.50             | 1.39  | TS2-3 | 10.09           | -0.25 | 3 | -6.23             | 1.13  | TS2-3 | 5.76            | 4.08  | 3 | -6.51             | 1.40  |
| TS3-4 | 11.43           | -0.46 | 4 | -5.32             | 1.14  | TS3-4 | 11.37           | -0.39 | 4 | -4.99             | 0.81  | TS3-4 | 6.67            | 4.31  | 4 | -5.27             | 1.10  |
| TS1-2 | 17.64           | 1.80  | 2 | 1.05              | 0.31  | TS1-2 | 17.36           | 1.52  | 2 | 1.12              | 0.25  | TS1-2 | 12.93           | 2.90  | 2 | 1.26              | 0.11  |
| TS2-3 | 15.33           | 0.30  | 3 | -2.27             | 1.46  | TS2-3 | 15.28           | 0.25  | 3 | -2.16             | 1.35  | TS2-3 | 11.69           | 3.34  | 3 | -1.54             | 0.73  |
| TS3-4 | 14.16           | 0.19  | 4 | -4.26             | 1.40  | TS3-4 | 13.96           | 0.01  | 4 | -4.09             | 1.23  | TS3-4 | 10.24           | 3.73  | 4 | -3.57             | 0.71  |
| MAD   |                 | 0.86  |   |                   | 1.04  |       |                 | 0.70  |   |                   | 0.83  |       |                 | 3.56  |   |                   | 0.74  |

| B2PLYPD3(0)     |       |   |                   |       |       | DSDPBEP86       |       |   |                   |       |       | revDSDPBEP86-D3(BJ) |       |   |                   |       |  |
|-----------------|-------|---|-------------------|-------|-------|-----------------|-------|---|-------------------|-------|-------|---------------------|-------|---|-------------------|-------|--|
| Barrier Heights |       |   | Reaction Energies |       |       | Barrier Heights |       |   | Reaction Energies |       |       | Barrier Heights     |       |   | Reaction Energies |       |  |
| $\Delta E$      | Er    |   | $\Delta E$        | Er    |       | $\Delta E$      | Er    |   | $\Delta E$        | Er    |       | $\Delta E$          | Er    |   | $\Delta E$        | Er    |  |
| 11.76           | 3.35  |   |                   |       | TS    | 13.59           | 1.52  |   |                   |       | TS    | 14.45               | 0.67  |   |                   |       |  |
| 11.18           | -3.34 | 2 | -0.05             | -0.04 | TS1-2 | 13.01           | -1.51 | 2 | 0.05              | 0.05  | TS1-2 | 13.86               | -0.66 | 2 | 0.00              | 0.01  |  |
| 11.72           | 3.65  | 3 | -1.24             | -0.37 | TS2-3 | 13.70           | 1.67  | 3 | -1.01             | -0.14 | TS2-3 | 14.51               | 0.86  | 3 | -1.06             | -0.19 |  |
| 10.27           | 3.73  | 4 | -0.95             | -0.28 | TS3-4 | 12.36           | 1.65  | 4 | -0.73             | -0.07 | TS3-4 | 13.15               | 0.85  | 4 | -0.80             | -0.14 |  |
| 10.63           | -3.40 | 2 | -0.60             | -0.14 | TS1-2 | 12.46           | -1.57 | 2 | -0.49             | -0.04 | TS1-2 | 13.32               | -0.71 | 2 | -0.50             | -0.05 |  |
| 7.99            | -3.52 | 3 | -4.74             | -0.93 | TS2-3 | 10.02           | -1.50 | 3 | -4.37             | -0.56 | TS2-3 | 10.67               | -0.84 | 3 | -4.29             | -0.48 |  |
| 6.62            | -4.18 | 4 | -4.02             | -0.67 | TS3-4 | 8.78            | -2.02 | 4 | -3.75             | -0.39 | TS3-4 | 9.70                | -1.10 | 4 | -3.71             | -0.35 |  |
| 11.97           | 3.40  | 2 | -2.79             | 0.47  | TS1-2 | 13.83           | 1.54  | 2 | -2.47             | 0.15  | TS1-2 | 14.69               | 0.68  | 2 | -2.45             | 0.13  |  |
| 5.63            | 4.21  | 3 | -6.35             | 1.25  | TS2-3 | 8.07            | 1.77  | 3 | -5.60             | 0.50  | TS2-3 | 8.86                | 0.98  | 3 | -5.51             | 0.41  |  |
| 6.57            | 4.41  | 4 | -5.06             | 0.89  | TS3-4 | 9.12            | 1.86  | 4 | -4.45             | 0.28  | TS3-4 | 10.01               | 0.97  | 4 | -4.42             | 0.25  |  |
| 12.72           | -3.12 | 2 | 1.29              | 0.07  | TS1-2 | 14.54           | -1.30 | 2 | 1.36              | 0.00  | TS1-2 | 15.33               | -0.51 | 2 | 1.34              | 0.03  |  |
| 11.65           | -3.38 | 3 | -1.27             | 0.46  | TS2-3 | 13.43           | -1.60 | 3 | -1.29             | 0.48  | TS2-3 | 14.16               | -0.87 | 3 | -1.22             | 0.41  |  |
| 10.27           | -3.70 | 4 | -3.23             | 0.37  | TS3-4 | 12.03           | -1.93 | 4 | -3.34             | 0.49  | TS3-4 | 12.93               | -1.04 | 4 | -3.28             | 0.42  |  |
| MAD             | 3.65  |   |                   | 0.50  |       |                 | 1.65  |   |                   | 0.26  |       |                     | 0.83  |   |                   | 0.24  |  |

|     | Functionals | M06L            |       |   |                   |       | TPSSh           |       |       |                   |       | B3LYP           |       |       |                   |    |       |       |
|-----|-------------|-----------------|-------|---|-------------------|-------|-----------------|-------|-------|-------------------|-------|-----------------|-------|-------|-------------------|----|-------|-------|
|     |             | Barrier Heights |       |   | Reaction Energies |       | Barrier Heights |       |       | Reaction Energies |       | Barrier Heights |       |       | Reaction Energies |    |       |       |
|     |             | $\Delta E$      | Er    |   | $\Delta E_r$      | Er    | $\Delta E$      | Er    |       | $\Delta E$        | Er    | $\Delta E$      | Er    |       | $\Delta E$        | Er |       |       |
| H   | TS          | 16.31           | -1.19 |   |                   |       | TS              | 13.06 | 2.05  |                   |       |                 | TS    | 12.83 | 2.29              |    |       |       |
| CH3 | TS1-2       | 15.79           | 1.28  | 2 | -0.46             | -0.46 | TS1-2           | 12.44 | -2.07 | 2                 | -0.64 | -0.63           | TS1-2 | 12.18 | -2.34             | 2  | -0.56 | -0.55 |
|     | TS2-3       | 14.92           | 0.45  | 3 | -2.60             | -1.74 | TS2-3           | 11.98 | 3.39  | 3                 | -2.57 | -1.70           | TS2-3 | 11.90 | 3.47              | 3  | -2.47 | -1.60 |
|     | TS3-4       | 13.50           | 0.50  | 4 | -2.18             | -1.51 | TS3-4           | 10.23 | 3.77  | 4                 | -2.30 | -1.63           | TS3-4 | 10.04 | 3.97              | 4  | -2.23 | -1.56 |
| NH3 | TS1-2       | 15.37           | 1.34  | 2 | -0.59             | 0.13  | TS1-2           | 11.90 | 2.13  | 2                 | -1.06 | 0.60            | TS1-2 | 11.62 | 2.41              | 2  | -1.02 | 0.57  |
|     | TS2-3       | 9.55            | 1.97  | 3 | -6.97             | 3.16  | TS2-3           | 7.75  | 3.77  | 3                 | -6.33 | 2.52            | TS2-3 | 7.60  | 3.92              | 3  | -6.05 | 2.24  |
|     | TS3-4       | 9.00            | 1.80  | 4 | -6.01             | 2.65  | TS3-4           | 6.29  | 4.50  | 4                 | -5.58 | 2.23            | TS3-4 | 6.29  | 4.50              | 4  | -5.34 | 1.99  |
| CN  | TS1-2       | 16.42           | -1.05 | 2 | -3.61             | 1.28  | TS1-2           | 13.22 | 2.15  | 2                 | -3.42 | 1.10            | TS1-2 | 13.00 | 2.37              | 2  | -3.29 | 0.97  |
|     | TS2-3       | 7.85            | 2.00  | 3 | -8.41             | 3.30  | TS2-3           | 5.49  | 4.35  | 3                 | -7.86 | 2.75            | TS2-3 | 5.47  | 4.37              | 3  | -7.50 | 2.40  |
|     | TS3-4       | 9.17            | 1.81  | 4 | -6.83             | 2.66  | TS3-4           | 6.48  | 4.50  | 4                 | -6.38 | 2.21            | TS3-4 | 6.44  | 4.54              | 4  | -6.16 | 1.99  |
| OH  | TS1-2       | 17.15           | 1.32  | 2 | 1.27              | 0.10  | TS1-2           | 13.97 | 1.87  | 2                 | 0.93  | 0.43            | TS1-2 | 13.63 | 2.21              | 2  | 0.99  | 0.38  |
|     | TS2-3       | 13.45           | 1.58  | 3 | -3.44             | 2.63  | TS2-3           | 11.47 | 3.56  | 3                 | -2.89 | 2.08            | TS2-3 | 11.69 | 3.34              | 3  | -2.20 | 1.39  |
|     | TS3-4       | 12.67           | 1.30  | 4 | -5.17             | 2.31  | TS3-4           | 9.93  | 4.04  | 4                 | -4.67 | 1.81            | TS3-4 | 10.34 | 3.62              | 4  | -4.05 | 1.20  |
| MAD |             |                 | 1.35  |   |                   | 1.83  |                 |       | 3.24  |                   |       | 1.64            |       |       | 3.33              |    |       | 1.40  |

|       | PBE0            |       |   |                   |       |       | M06             |       |   |                   |       |       | CAM-B3LYP       |       |   |                   |       |
|-------|-----------------|-------|---|-------------------|-------|-------|-----------------|-------|---|-------------------|-------|-------|-----------------|-------|---|-------------------|-------|
|       | Barrier Heights |       |   | Reaction Energies |       |       | Barrier Heights |       |   | Reaction Energies |       |       | Barrier Heights |       |   | Reaction Energies |       |
|       | $\Delta E$      | Er    |   | $\Delta E$        | Er    |       | $\Delta E$      | Er    |   | $\Delta E$        | Er    |       | $\Delta E$      | Er    |   | $\Delta E$        | Er    |
| TS    | 15.48           | -0.36 |   |                   |       | TS    | 17.98           | -2.87 |   |                   |       | TS    | 17.79           | -2.67 |   |                   |       |
| TS1-2 | 14.88           | 0.36  | 2 | -0.42             | -0.41 | TS1-2 | 17.53           | 3.01  | 2 | 0.07              | 0.08  | TS1-2 | 17.16           | 2.64  | 2 | -0.33             | -0.33 |
| TS2-3 | 14.65           | 0.72  | 3 | -2.30             | -1.44 | TS2-3 | 17.56           | -2.19 | 3 | -1.46             | -0.59 | TS2-3 | 17.28           | -1.91 | 3 | -1.96             | -1.09 |
| TS3-4 | 12.89           | 1.11  | 4 | -2.04             | -1.37 | TS3-4 | 16.31           | -2.31 | 4 | -1.16             | -0.49 | TS3-4 | 15.52           | -1.52 | 4 | -1.74             | -1.07 |
| TS1-2 | 14.22           | 0.19  | 2 | -1.08             | 0.63  | TS1-2 | 16.94           | 2.91  | 2 | -0.43             | 0.03  | TS1-2 | 16.55           | 2.52  | 2 | -0.86             | 0.40  |
| TS2-3 | 9.77            | 1.74  | 3 | -6.32             | 2.51  | TS2-3 | 11.92           | 0.41  | 3 | -5.64             | 1.83  | TS2-3 | 12.28           | 0.76  | 3 | -5.43             | 1.62  |
| TS3-4 | 8.69            | 2.10  | 4 | -5.55             | 2.19  | TS3-4 | 11.92           | 1.12  | 4 | -4.86             | 1.50  | TS3-4 | 11.82           | 1.02  | 4 | -4.78             | 1.42  |
| TS1-2 | 15.66           | -0.29 | 2 | -3.11             | 0.79  | TS1-2 | 18.19           | -2.82 | 2 | -2.93             | 0.61  | TS1-2 | 18.02           | -2.65 | 2 | -2.72             | 0.40  |
| TS2-3 | 8.37            | 1.47  | 3 | -7.19             | 2.09  | TS2-3 | 10.81           | -0.96 | 3 | -6.64             | 1.54  | TS2-3 | 11.26           | -1.41 | 3 | -6.20             | 1.09  |
| TS3-4 | 9.48            | 1.50  | 4 | -5.88             | 1.71  | TS3-4 | 12.47           | -1.50 | 4 | -5.41             | 1.23  | TS3-4 | 12.60           | -1.62 | 4 | -5.13             | 0.96  |
| TS1-2 | 16.34           | 0.51  | 2 | 0.88              | 0.48  | TS1-2 | 18.82           | 2.99  | 2 | 1.47              | -0.10 | TS1-2 | 18.58           | 2.75  | 2 | 1.20              | 0.17  |
| TS2-3 | 13.63           | 1.41  | 3 | -2.82             | 2.01  | TS2-3 | 15.86           | 0.83  | 3 | -2.24             | 1.43  | TS2-3 | 16.63           | 1.60  | 3 | -1.64             | 0.83  |
| TS3-4 | 12.36           | 1.60  | 4 | -4.64             | 1.79  | TS3-4 | 15.45           | 1.48  | 4 | -4.10             | 1.24  | TS3-4 | 15.76           | 1.80  | 4 | -3.57             | 0.71  |
| MAD   |                 | 1.03  |   |                   | 1.45  |       |                 | 1.95  |   |                   | 0.89  |       |                 | 1.91  |   |                   | 0.84  |



|       | wb97XD          |       |   |                   |       |       | B3LYP-D3        |       |   |                   |       |
|-------|-----------------|-------|---|-------------------|-------|-------|-----------------|-------|---|-------------------|-------|
|       | Barrier Heights |       |   | Reaction Energies |       |       | Barrier Heights |       |   | Reaction Energies |       |
|       | $\Delta E$      | Er    |   | $\Delta E$        | Er    |       | $\Delta E$      | Er    |   | $\Delta E$        | Er    |
| TS    | 17.49           | -2.38 |   |                   |       | TS    | 12.31           | 2.81  |   |                   |       |
| TS1-2 | 16.93           | 2.41  | 2 | -0.26             | -0.25 | TS1-2 | 11.78           | -2.74 | 2 | -0.25             | -0.24 |
| TS2-3 | 17.01           | -1.64 | 3 | -1.78             | -0.91 | TS2-3 | 11.90           | 3.47  | 3 | -1.79             | -0.92 |
| TS3-4 | 15.49           | -1.48 | 4 | -1.46             | -0.79 | TS3-4 | 10.27           | 3.73  | 4 | -1.41             | -0.74 |
| TS1-2 | 16.26           | 2.23  | 2 | -0.90             | 0.44  | TS1-2 | 11.17           | 2.86  | 2 | -0.86             | 0.40  |
| TS2-3 | 11.79           | 0.27  | 3 | -5.52             | 1.71  | TS2-3 | 7.60            | 3.92  | 3 | -5.50             | 1.69  |
| TS3-4 | 11.48           | 0.68  | 4 | -4.79             | 1.43  | TS3-4 | 6.43            | 4.37  | 4 | -4.66             | 1.31  |
| TS1-2 | 17.70           | -2.33 | 2 | -2.75             | 0.43  | TS1-2 | 12.55           | 2.83  | 2 | -3.18             | 0.86  |
| TS2-3 | 11.00           | -1.15 | 3 | -6.18             | 1.07  | TS2-3 | 5.22            | 4.62  | 3 | -7.23             | 2.12  |
| TS3-4 | 12.38           | -1.41 | 4 | -5.07             | 0.89  | TS3-4 | 6.25            | 4.72  | 4 | -5.79             | 1.62  |
| TS1-2 | 18.24           | 2.41  | 2 | 0.94              | 0.43  | TS1-2 | 13.24           | 2.60  | 2 | 1.04              | 0.33  |
| TS2-3 | 15.58           | 0.55  | 3 | -2.35             | 1.54  | TS2-3 | 11.59           | 3.44  | 3 | -1.75             | 0.94  |
| TS3-4 | 14.79           | 0.82  | 4 | -4.17             | 1.31  | TS3-4 | 10.37           | 3.60  | 4 | -3.45             | 0.60  |
| MAD   |                 | 1.52  |   |                   | 0.93  |       |                 | 3.52  |   |                   | 0.98  |

**Table S13.** DLPNO-CCSD(T) reaction energies (kcal/mol) computed with the aug-cc-pVTZ and aug-cc-pVQZ basis sets and extrapolated at complete basis set limit according to a two point extrapolation scheme ( $\alpha = 5.79$  and  $\beta = 3.05$ ).

|                                                                                   | aug-cc-pVTZ | aug-cc-pVQZ | CBS    |
|-----------------------------------------------------------------------------------|-------------|-------------|--------|
| <i>n</i> -octane→tetramethylbutane                                                | -2.491      | -1.807      | -1.331 |
| <i>n</i> -undecane→hexamethylbutane                                               | 6.419       | 7.951       | 8.996  |
| C <sub>14</sub> H <sub>30</sub> (linear)→C <sub>28</sub> H <sub>20</sub> (folded) | 1.951       | 2.836       | 3.434  |
| C <sub>22</sub> H <sub>46</sub> (linear)→C <sub>22</sub> H <sub>46</sub> (folded) | -2.407      | -0.776      | 0.328  |
| C <sub>30</sub> H <sub>62</sub> (linear)→C <sub>30</sub> H <sub>62</sub> (folded) | -6.871      | -4.527      | -2.939 |

n\_oktane  
26

|   |               |               |               |
|---|---------------|---------------|---------------|
| C | -0.1614620000 | 4.4569880000  | 0.0000000000  |
| C | -0.8313160000 | 3.0940090000  | 0.0000000000  |
| C | 0.1614620000  | 1.9436090000  | 0.0000000000  |
| C | -0.4965940000 | 0.5746890000  | 0.0000000000  |
| C | 0.4965940000  | -0.5746890000 | 0.0000000000  |
| C | -0.1614620000 | -1.9436090000 | 0.0000000000  |
| C | 0.8313160000  | -3.0940090000 | 0.0000000000  |
| C | 0.1614620000  | -4.4569880000 | 0.0000000000  |
| H | -0.8934560000 | 5.2668790000  | 0.0000000000  |
| H | 0.4730940000  | 4.5827170000  | 0.8810000000  |
| H | 0.4730940000  | 4.5827170000  | -0.8810000000 |
| H | -1.4849260000 | 3.0045060000  | -0.8745100000 |
| H | -1.4849260000 | 3.0045060000  | 0.8745100000  |
| H | 0.8165870000  | 2.0315690000  | -0.8750300000 |
| H | 0.8165870000  | 2.0315690000  | 0.8750300000  |
| H | -1.1515520000 | 0.4875230000  | -0.8750580000 |
| H | -1.1515520000 | 0.4875230000  | 0.8750580000  |
| H | 1.1515520000  | -0.4875230000 | -0.8750580000 |
| H | 1.1515520000  | -0.4875230000 | 0.8750580000  |
| H | -0.8165870000 | -2.0315690000 | -0.8750300000 |
| H | -0.8165870000 | -2.0315690000 | 0.8750300000  |
| H | 1.4849260000  | -3.0045060000 | -0.8745100000 |
| H | 1.4849260000  | -3.0045060000 | 0.8745100000  |
| H | -0.4730940000 | -4.5827170000 | -0.8810000000 |
| H | 0.8934560000  | -5.2668790000 | 0.0000000000  |
| H | -0.4730940000 | -4.5827170000 | 0.8810000000  |

branched\_ektane  
26

|   |               |               |               |
|---|---------------|---------------|---------------|
| C | 0.0000000000  | 0.0000000000  | 0.7850770000  |
| C | 0.0000000000  | 0.0000000000  | -0.7850770000 |
| C | -0.8372550000 | 1.1548960000  | 1.3384700000  |
| C | 1.4187970000  | 0.1476360000  | 1.3384700000  |
| C | -0.5815420000 | -1.3025320000 | 1.3384700000  |
| C | 0.8372550000  | 1.1548960000  | -1.3384700000 |
| C | -1.4187970000 | 0.1476360000  | -1.3384700000 |
| C | 0.5815420000  | -1.3025320000 | -1.3384700000 |
| H | -0.5274160000 | 2.1199500000  | 0.9330490000  |
| H | -1.8997390000 | 1.0242590000  | 1.1286450000  |
| H | -0.7219640000 | 1.2048940000  | 2.4237940000  |
| H | 1.8369030000  | 1.1330930000  | 1.1286450000  |
| H | 1.4044510000  | 0.0227930000  | 2.4237940000  |
| H | 2.0996380000  | -0.6032190000 | 0.9330490000  |
| H | -1.5722220000 | -1.5167300000 | 0.9330490000  |
| H | 0.0628360000  | -2.1573510000 | 1.1286450000  |
| H | -0.6824860000 | -1.2276860000 | 2.4237940000  |
| H | 0.5274160000  | 2.1199500000  | -0.9330490000 |
| H | 1.8997390000  | 1.0242590000  | -1.1286450000 |
| H | 0.7219640000  | 1.2048940000  | -2.4237940000 |
| H | -1.8369030000 | 1.1330930000  | -1.1286450000 |
| H | -1.4044510000 | 0.0227930000  | -2.4237940000 |
| H | -2.0996380000 | -0.6032190000 | -0.9330490000 |
| H | 1.5722220000  | -1.5167300000 | -0.9330490000 |
| H | -0.0628360000 | -2.1573510000 | -1.1286450000 |
| H | 0.6824860000  | -1.2276860000 | -2.4237940000 |

n\_undecane

35

|   |               |               |               |
|---|---------------|---------------|---------------|
| C | -0.0000000000 | 6.3450380000  | -0.3789880000 |
| C | -0.0000000000 | 5.0823900000  | 0.4649910000  |
| C | -0.0000000000 | 3.8110060000  | -0.3672980000 |
| C | -0.0000000000 | 2.5407330000  | 0.4654110000  |
| C | -0.0000000000 | 1.2703640000  | -0.3675820000 |
| C | -0.0000000000 | 0.0000000000  | 0.4653030000  |
| C | -0.0000000000 | -1.2703640000 | -0.3675820000 |
| C | -0.0000000000 | -2.5407330000 | 0.4654110000  |
| C | -0.0000000000 | -3.8110060000 | -0.3672980000 |
| C | -0.0000000000 | -5.0823900000 | 0.4649910000  |
| C | -0.0000000000 | -6.3450380000 | -0.3789880000 |
| H | -0.0000000000 | 7.2446090000  | 0.2395850000  |
| H | 0.8810110000  | 6.3857710000  | -1.0246220000 |
| H | -0.8810110000 | 6.3857710000  | -1.0246220000 |
| H | -0.8745170000 | 5.0800660000  | 1.1246890000  |
| H | 0.8745170000  | 5.0800660000  | 1.1246890000  |
| H | -0.8750400000 | 3.8119030000  | -1.0282810000 |
| H | 0.8750400000  | 3.8119030000  | -1.0282810000 |
| H | -0.8750510000 | 2.5406430000  | 1.1261520000  |
| H | 0.8750510000  | 2.5406430000  | 1.1261520000  |
| H | -0.8750110000 | 1.2704030000  | -1.0283270000 |
| H | 0.8750110000  | 1.2704030000  | -1.0283270000 |
| H | -0.8750100000 | 0.0000000000  | 1.1260810000  |
| H | 0.8750100000  | -0.0000000000 | 1.1260810000  |
| H | -0.8750110000 | -1.2704030000 | -1.0283270000 |
| H | 0.8750110000  | -1.2704030000 | -1.0283270000 |
| H | -0.8750510000 | -2.5406430000 | 1.1261520000  |
| H | 0.8750510000  | -2.5406430000 | 1.1261520000  |
| H | -0.8750400000 | -3.8119030000 | -1.0282810000 |
| H | 0.8750400000  | -3.8119030000 | -1.0282810000 |
| H | -0.8745170000 | -5.0800660000 | 1.1246890000  |
| H | 0.8745170000  | -5.0800660000 | 1.1246890000  |
| H | -0.8810110000 | -6.3857710000 | -1.0246220000 |
| H | -0.0000000000 | -7.2446090000 | 0.2395850000  |
| H | 0.8810110000  | -6.3857710000 | -1.0246220000 |

branched\_undecane

35

|   |               |               |               |
|---|---------------|---------------|---------------|
| C | -0.0000000000 | 2.5638690000  | 0.6644410000  |
| C | -0.2071220000 | 1.3398980000  | -0.2435140000 |
| C | -0.0000000000 | 0.0000000000  | 0.5880770000  |
| C | 0.2071220000  | -1.3398980000 | -0.2435140000 |
| C | -0.0000000000 | -2.5638690000 | 0.6644410000  |
| C | 0.7816050000  | 1.5199830000  | -1.3971640000 |
| C | -1.6246990000 | 1.4857480000  | -0.8123520000 |
| C | 1.2167240000  | 0.1798430000  | 1.5061700000  |
| C | -1.2167240000 | -0.1798430000 | 1.5061700000  |
| C | 1.6246990000  | -1.4857480000 | -0.8123520000 |
| C | -0.7816050000 | -1.5199830000 | -1.3971640000 |
| H | 1.0411250000  | 2.6846400000  | 0.9638090000  |
| H | -0.2862660000 | 3.4630940000  | 0.1144810000  |
| H | -0.6111230000 | 2.5298680000  | 1.5675510000  |
| H | 0.6111230000  | -2.5298680000 | 1.5675510000  |
| H | -1.0411250000 | -2.6846400000 | 0.9638090000  |
| H | 0.2862660000  | -3.4630940000 | 0.1144810000  |
| H | 1.8178070000  | 1.4414110000  | -1.0645050000 |
| H | 0.6256670000  | 0.8074210000  | -2.2054780000 |
| H | 0.6535500000  | 2.5196740000  | -1.8201820000 |
| H | -2.3746350000 | 1.5352220000  | -0.0221800000 |
| H | -1.6854640000 | 2.4227190000  | -1.3714940000 |
| H | -1.9034100000 | 0.6847960000  | -1.4914620000 |
| H | 2.0954080000  | 0.5417480000  | 0.9708590000  |
| H | 0.9982850000  | 0.8880030000  | 2.3049680000  |
| H | 1.4887590000  | -0.7614270000 | 1.9839180000  |
| H | -2.0954080000 | -0.5417480000 | 0.9708590000  |
| H | -0.9982850000 | -0.8880030000 | 2.3049680000  |
| H | -1.4887590000 | 0.7614270000  | 1.9839180000  |
| H | 2.3746350000  | -1.5352220000 | -0.0221800000 |
| H | 1.6854640000  | -2.4227190000 | -1.3714940000 |
| H | 1.9034100000  | -0.6847960000 | -1.4914620000 |
| H | -1.8178070000 | -1.4414110000 | -1.0645050000 |
| H | -0.6256670000 | -0.8074210000 | -2.2054780000 |
| H | -0.6535500000 | -2.5196740000 | -1.8201820000 |

C14H30\_linear

44

|   |               |               |               |
|---|---------------|---------------|---------------|
| C | -4.1655020000 | 7.1345060000  | 0.0000000000  |
| C | -4.1790630000 | 5.6157540000  | 0.0000000000  |
| C | -2.7859090000 | 5.0088000000  | 0.0000000000  |
| C | -2.7859090000 | 3.4898780000  | 0.0000000000  |
| C | -1.3928220000 | 2.8841740000  | 0.0000000000  |
| C | -1.3929890000 | 1.3651560000  | 0.0000000000  |
| C | 0.0000690000  | 0.7595050000  | 0.0000000000  |
| C | -0.0000690000 | -0.7595050000 | 0.0000000000  |
| C | 1.3929890000  | -1.3651560000 | 0.0000000000  |
| C | 1.3928220000  | -2.8841740000 | 0.0000000000  |
| C | 2.7859090000  | -3.4898780000 | 0.0000000000  |
| C | 2.7859090000  | -5.0088000000 | 0.0000000000  |
| C | 4.1790630000  | -5.6157540000 | 0.0000000000  |
| C | 4.1655020000  | -7.1345060000 | 0.0000000000  |
| H | -5.1759490000 | 7.5475530000  | 0.0000000000  |
| H | -3.6479830000 | 7.5225080000  | 0.8809950000  |
| H | -3.6479830000 | 7.5225080000  | -0.8809950000 |
| H | -4.7293630000 | 5.2520020000  | -0.8744830000 |
| H | -4.7293630000 | 5.2520020000  | 0.8744830000  |
| H | -2.2335810000 | 5.3718430000  | -0.8750070000 |
| H | -2.2335810000 | 5.3718430000  | 0.8750070000  |
| H | -3.3383860000 | 3.1275520000  | -0.8750440000 |
| H | -3.3383860000 | 3.1275520000  | 0.8750440000  |
| H | -0.8402780000 | 3.2464100000  | -0.8750080000 |
| H | -0.8402780000 | 3.2464100000  | 0.8750080000  |
| H | -1.9455250000 | 1.0028930000  | -0.8750120000 |
| H | -1.9455250000 | 1.0028930000  | 0.8750120000  |
| H | 0.5526110000  | 1.1217640000  | -0.8750100000 |
| H | 0.5526110000  | 1.1217640000  | 0.8750100000  |
| H | -0.5526110000 | -1.1217640000 | -0.8750100000 |
| H | -0.5526110000 | -1.1217640000 | 0.8750100000  |
| H | 1.9455250000  | -1.0028930000 | -0.8750120000 |
| H | 1.9455250000  | -1.0028930000 | 0.8750120000  |
| H | 0.8402780000  | -3.2464100000 | -0.8750080000 |
| H | 0.8402780000  | -3.2464100000 | 0.8750080000  |
| H | 3.3383860000  | -3.1275520000 | -0.8750440000 |
| H | 3.3383860000  | -3.1275520000 | 0.8750440000  |
| H | 2.2335810000  | -5.3718430000 | -0.8750070000 |
| H | 2.2335810000  | -5.3718430000 | 0.8750070000  |
| H | 4.7293630000  | -5.2520020000 | -0.8744830000 |
| H | 4.7293630000  | -5.2520020000 | 0.8744830000  |
| H | 3.6479830000  | -7.5225080000 | -0.8809950000 |
| H | 3.6479830000  | -7.5225080000 | 0.8809950000  |
| H | 5.1759490000  | -7.5475530000 | 0.0000000000  |
| H | 3.6479830000  | -7.5225080000 | 0.8809950000  |

C14H30\_folded

44

|   |               |               |               |
|---|---------------|---------------|---------------|
| C | 0.9575780000  | 1.8254380000  | 0.0880150000  |
| C | 1.3004120000  | 1.0453580000  | 1.3455020000  |
| C | 0.5508850000  | 1.5226670000  | 2.5846200000  |
| C | 0.5508850000  | 0.5309240000  | 3.7484530000  |
| C | -0.5508850000 | -0.5309240000 | 3.7484530000  |
| C | -0.5508850000 | -1.5226670000 | 2.5846200000  |
| C | -1.3004120000 | -1.0453580000 | 1.3455020000  |
| C | -0.9575780000 | -1.8254380000 | 0.0880150000  |
| C | -1.5753230000 | -1.2382870000 | -1.1693490000 |
| C | -1.1329020000 | -1.9320330000 | -2.4464650000 |
| C | -1.7058690000 | -1.2907070000 | -3.6979900000 |
| C | 1.5753230000  | 1.2382870000  | -1.1693490000 |
| C | 1.1329020000  | 1.9320330000  | -2.4464650000 |
| C | 1.7058690000  | 1.2907070000  | -3.6979900000 |
| H | 1.2604860000  | 2.8730180000  | 0.1996200000  |
| H | -0.1330880000 | 1.8417530000  | -0.0298230000 |
| H | 1.0871630000  | -0.0102520000 | 1.1641000000  |
| H | 2.3785130000  | 1.0971020000  | 1.5342070000  |
| H | -0.4848690000 | 1.7622670000  | 2.3182170000  |
| H | 0.9927570000  | 2.4684360000  | 2.9137730000  |
| H | 1.5265720000  | 0.0320620000  | 3.7922990000  |
| H | 0.4607660000  | 1.0882110000  | 4.6856930000  |
| H | -1.5265720000 | -0.0320620000 | 3.7922990000  |
| H | -0.4607660000 | -1.0882110000 | 4.6856930000  |
| H | 0.4848690000  | -1.7622670000 | 2.3182170000  |
| H | -0.9927570000 | -2.4684360000 | 2.9137730000  |
| H | -1.0871630000 | 0.0102520000  | 1.1641000000  |
| H | -2.3785130000 | -1.0971020000 | 1.5342070000  |
| H | 0.1330880000  | -1.8417530000 | -0.0298230000 |
| H | -1.2604860000 | -2.8730180000 | 0.1996200000  |
| H | -1.3095280000 | -0.1760550000 | -1.2318510000 |
| H | -2.6686660000 | -1.2696540000 | -1.0950780000 |
| H | -0.0382720000 | -1.9198300000 | -2.4966440000 |
| H | -1.4201870000 | -2.9881590000 | -2.4051290000 |
| H | -1.3970330000 | -0.2451030000 | -3.7775600000 |
| H | -1.3748900000 | -1.8036260000 | -4.6030180000 |
| H | -2.7985520000 | -1.3099260000 | -3.6855250000 |
| H | 1.3095280000  | 0.1760550000  | -1.2318510000 |
| H | 2.6686660000  | 1.2696540000  | -1.0950780000 |
| H | 0.0382720000  | 1.9198300000  | -2.4966440000 |
| H | 1.4201870000  | 2.9881590000  | -2.4051290000 |
| H | 1.3970330000  | 0.2451030000  | -3.7775600000 |
| H | 1.3748900000  | 1.8036260000  | -4.6030180000 |
| H | 2.7985520000  | 1.3099260000  | -3.6855250000 |



|   |               |                |               |
|---|---------------|----------------|---------------|
| C | -0.4164410000 | 6.9865440000   | 0.0000000000  |
| C | 0.4164510000  | 5.7162420000   | 0.0000000000  |
| C | -0.4165310000 | 4.4459840000   | 0.0000000000  |
| C | 0.4163850000  | 3.1756970000   | 0.0000000000  |
| C | -0.4165290000 | 1.9054110000   | 0.0000000000  |
| C | 0.4164410000  | 0.6351540000   | 0.0000000000  |
| C | -0.4164410000 | -0.6351540000  | 0.0000000000  |
| C | 0.4165290000  | -1.9054110000  | 0.0000000000  |
| C | -0.4163850000 | -3.1756970000  | 0.0000000000  |
| C | 0.4165310000  | -4.4459840000  | 0.0000000000  |
| C | -0.4164510000 | -5.7162420000  | 0.0000000000  |
| C | 0.4164410000  | -6.9865440000  | 0.0000000000  |
| C | -0.4165630000 | -8.2567950000  | 0.0000000000  |
| C | 0.4163840000  | -9.5271230000  | 0.0000000000  |
| C | -0.4163480000 | -10.7974370000 | 0.0000000000  |
| C | 0.4160650000  | -12.0687900000 | 0.0000000000  |
| C | -0.4278440000 | -13.3315570000 | 0.0000000000  |
| C | 0.4165630000  | 8.2567950000   | 0.0000000000  |
| C | -0.4163840000 | 9.5271230000   | 0.0000000000  |
| C | 0.4163480000  | 10.7974370000  | 0.0000000000  |
| C | -0.4160650000 | 12.0687900000  | 0.0000000000  |
| C | 0.4278440000  | 13.3315570000  | 0.0000000000  |
| H | -1.0771300000 | 6.9865670000   | 0.8750110000  |
| H | -1.0771300000 | 6.9865670000   | -0.8750110000 |
| H | 1.0771420000  | 5.7162020000   | -0.8750090000 |
| H | 1.0771420000  | 5.7162020000   | 0.8750090000  |
| H | -1.0772230000 | 4.4460040000   | -0.8750080000 |
| H | -1.0772230000 | 4.4460040000   | 0.8750080000  |
| H | 1.0770840000  | 3.1756980000   | -0.8750060000 |
| H | 1.0770840000  | 3.1756980000   | 0.8750060000  |
| H | -1.0772270000 | 1.9053890000   | -0.8750060000 |
| H | -1.0772270000 | 1.9053890000   | 0.8750060000  |
| H | 1.0771370000  | 0.6351820000   | -0.8750070000 |
| H | 1.0771370000  | 0.6351820000   | 0.8750070000  |
| H | -1.0771370000 | -0.6351820000  | -0.8750070000 |
| H | -1.0771370000 | -0.6351820000  | 0.8750070000  |
| H | 1.0772270000  | -1.9053890000  | -0.8750060000 |
| H | 1.0772270000  | -1.9053890000  | 0.8750060000  |
| H | -1.0770840000 | -3.1756980000  | -0.8750060000 |
| H | -1.0770840000 | -3.1756980000  | 0.8750060000  |
| H | 1.0772230000  | -4.4460040000  | -0.8750080000 |
| H | 1.0772230000  | -4.4460040000  | 0.8750080000  |
| H | -1.0771420000 | -5.7162020000  | -0.8750090000 |
| H | -1.0771420000 | -5.7162020000  | 0.8750090000  |
| H | 1.0771300000  | -6.9865670000  | -0.8750110000 |
| H | 1.0771300000  | -6.9865670000  | 0.8750110000  |
| H | -1.0772410000 | -8.2567590000  | -0.8750060000 |
| H | -1.0772410000 | -8.2567590000  | 0.8750060000  |
| H | 1.0770530000  | -9.5270240000  | -0.8750460000 |
| H | 1.0770530000  | -9.5270240000  | 0.8750460000  |
| H | -1.0772830000 | -10.7982500000 | -0.8750080000 |
| H | -1.0772830000 | -10.7982500000 | 0.8750080000  |
| H | 1.0757040000  | -12.0662500000 | -0.8744820000 |
| H | 1.0757040000  | -12.0662500000 | 0.8744820000  |
| H | -1.0733680000 | -13.3723510000 | -0.8809860000 |
| H | 0.1908000000  | -14.2309290000 | 0.0000000000  |
| H | -1.0733680000 | -13.3723510000 | 0.8809860000  |
| H | 1.0772410000  | 8.2567590000   | -0.8750060000 |
| H | 1.0772410000  | 8.2567590000   | 0.8750060000  |
| H | -1.0770530000 | 9.5270240000   | -0.8750460000 |
| H | -1.0770530000 | 9.5270240000   | 0.8750460000  |
| H | 1.0772830000  | 10.7982500000  | -0.8750080000 |
| H | 1.0772830000  | 10.7982500000  | 0.8750080000  |
| H | -1.0757040000 | 12.0662500000  | -0.8744820000 |
| H | -1.0757040000 | 12.0662500000  | 0.8744820000  |
| H | 1.0733680000  | 13.3723510000  | -0.8809860000 |
| H | -0.1908000000 | 14.2309290000  | 0.0000000000  |
| H | 1.0733680000  | 13.3723510000  | 0.8809860000  |

|   |               |               |               |
|---|---------------|---------------|---------------|
| C | 2.0355120000  | -0.1842100000 | -2.6212890000 |
| C | 1.5813410000  | 0.5295710000  | -3.8830700000 |
| C | 1.5813410000  | -0.3572600000 | -5.1237030000 |
| C | 0.7441120000  | 0.1782270000  | -6.2859980000 |
| C | -0.7441120000 | -0.1782270000 | -6.2859980000 |
| C | -1.5813410000 | 0.3572600000  | -5.1237030000 |
| C | -1.5813410000 | -0.5295710000 | -3.8830700000 |
| C | -2.0355120000 | 0.1842100000  | -2.6212890000 |
| C | -1.8563620000 | -0.6499700000 | -1.3641690000 |
| C | -2.1384730000 | 0.1124070000  | -0.0813800000 |
| C | -1.8660870000 | -0.6988970000 | 1.1733500000  |
| C | -2.1021050000 | 0.0747470000  | 2.4586300000  |
| C | -1.8226240000 | -0.7354670000 | 3.7122570000  |
| C | -2.0528240000 | 0.0394040000  | 4.9986320000  |
| C | -1.7825040000 | -0.7836220000 | 6.2456980000  |
| C | 1.8563620000  | 0.6499700000  | -1.3641690000 |
| C | 2.1384730000  | -0.1124070000 | -0.0813800000 |
| C | 1.8660870000  | 0.6988970000  | 1.1733500000  |
| C | 2.1021050000  | -0.0747470000 | 2.4586300000  |
| C | 1.8226240000  | 0.7354670000  | 3.7122570000  |
| C | 2.0528240000  | -0.0394040000 | 4.9986320000  |
| C | 1.7825040000  | 0.7836220000  | 6.2456980000  |
| H | 3.0813190000  | -0.4976020000 | -2.7186950000 |
| H | 1.4563060000  | -1.1097410000 | -2.5140210000 |
| H | 0.5785880000  | 0.9259870000  | -3.7099300000 |
| H | 2.2137600000  | 1.4055240000  | -4.0654400000 |
| H | 1.2265050000  | -1.3597990000 | -4.8588200000 |
| H | 2.6159800000  | -0.4928640000 | -5.4540330000 |
| H | 0.8492180000  | 1.2690520000  | -6.3285930000 |
| H | 1.1643260000  | -0.1966140000 | -7.2241120000 |
| H | -0.8492180000 | -1.2690520000 | -6.3285930000 |
| H | -1.1643260000 | 0.1966140000  | -7.2241120000 |
| H | -1.2265050000 | 1.3597990000  | -4.8588200000 |
| H | -2.6159800000 | 0.4928640000  | -5.4540330000 |
| H | -0.5785880000 | -0.9259870000 | -3.7099300000 |
| H | -2.2137600000 | -1.4055240000 | -4.0654400000 |
| H | -1.4563060000 | 1.1097410000  | -2.5140210000 |
| H | -3.0813190000 | 0.4976020000  | -2.7186950000 |
| H | -0.8257520000 | -1.0229960000 | -1.3336440000 |
| H | -2.4955150000 | -1.5390350000 | -1.4135060000 |
| H | -1.5221570000 | 1.0195200000  | -0.0626850000 |
| H | -3.1791730000 | 0.4568870000  | -0.0769950000 |
| H | -0.8291520000 | -1.0546050000 | 1.1523380000  |
| H | -2.4924720000 | -1.5986270000 | 1.1696560000  |
| H | -1.4727450000 | 0.9728710000  | 2.4599810000  |
| H | -3.1375540000 | 0.4344940000  | 2.4821170000  |
| H | -0.7873600000 | -1.0955520000 | 3.6878270000  |
| H | -2.4525690000 | -1.6329680000 | 3.7127410000  |
| H | -1.4158690000 | 0.9307410000  | 4.9988830000  |
| H | -3.0841230000 | 0.4081620000  | 5.0165830000  |
| H | -0.7502860000 | -1.1414520000 | 6.2646860000  |
| H | -1.9479570000 | -0.2040630000 | 7.1559160000  |
| H | -2.4345040000 | -1.6598090000 | 6.2859980000  |
| H | 0.8257520000  | 1.0229960000  | -1.3336440000 |
| H | 2.4955150000  | 1.5390350000  | -1.4135060000 |
| H | 1.5221570000  | -1.0195200000 | -0.0626850000 |
| H | 3.1791730000  | -0.4568870000 | -0.0769950000 |
| H | 0.8291520000  | 1.0546050000  | 1.1523380000  |
| H | 2.4924720000  | 1.5986270000  | 1.1696560000  |
| H | 1.4727450000  | -0.9728710000 | 2.4599810000  |
| H | 3.1375540000  | -0.4344940000 | 2.4821170000  |
| H | 0.7873600000  | 1.0955520000  | 3.6878270000  |
| H | 2.4525690000  | 1.6329680000  | 3.7127410000  |
| H | 1.4158690000  | -0.9307410000 | 4.9988830000  |
| H | 3.0841230000  | -0.4081620000 | 5.0165830000  |
| H | 0.7502860000  | 1.1414520000  | 6.2646860000  |
| H | 1.9479570000  | 0.2040630000  | 7.1559160000  |
| H | 2.4345040000  | 1.6598090000  | 6.2859980000  |

|   |               |                |               |
|---|---------------|----------------|---------------|
| C | -0.4281720000 | -18.4125220000 | 0.0000000000  |
| C | 0.4158710000  | -17.1498560000 | 0.0000000000  |
| C | -0.4164180000 | -15.8784370000 | 0.0000000000  |
| C | 0.4163810000  | -14.6081840000 | 0.0000000000  |
| C | -0.4165170000 | -13.3378360000 | 0.0000000000  |
| C | 0.4164800000  | -12.0675980000 | 0.0000000000  |
| C | -0.4164220000 | -10.7973080000 | 0.0000000000  |
| C | 0.4165270000  | -9.5270520000  | 0.0000000000  |
| C | -0.4163830000 | -8.2567730000  | 0.0000000000  |
| C | 0.4165420000  | -6.9865040000  | 0.0000000000  |
| C | -0.4163800000 | -5.7162330000  | 0.0000000000  |
| C | 0.4165270000  | -4.4459540000  | 0.0000000000  |
| C | -0.4164060000 | -3.1756900000  | 0.0000000000  |
| C | 0.4164910000  | -1.9054040000  | 0.0000000000  |
| C | -0.4164470000 | -0.6351440000  | 0.0000000000  |
| C | 0.4164470000  | 0.6351440000   | 0.0000000000  |
| C | -0.4164910000 | 1.9054040000   | 0.0000000000  |
| C | 0.4164060000  | 3.1756900000   | 0.0000000000  |
| C | -0.4165270000 | 4.4459540000   | 0.0000000000  |
| C | 0.4163800000  | 5.7162330000   | 0.0000000000  |
| C | -0.4165420000 | 6.9865040000   | 0.0000000000  |
| C | 0.4163830000  | 8.2567730000   | 0.0000000000  |
| C | -0.4165270000 | 9.5270520000   | 0.0000000000  |
| C | 0.4164220000  | 10.7973080000  | 0.0000000000  |
| C | -0.4164800000 | 12.0675980000  | 0.0000000000  |
| C | 0.4165170000  | 13.3378360000  | 0.0000000000  |
| C | -0.4163810000 | 14.6081840000  | 0.0000000000  |
| C | 0.4164180000  | 15.8784370000  | 0.0000000000  |
| C | -0.4158710000 | 17.1498560000  | 0.0000000000  |
| C | 0.4281720000  | 18.4125220000  | 0.0000000000  |
| H | 0.1903530000  | -19.3119650000 | 0.0000000000  |
| H | -1.0736950000 | -18.4532300000 | 0.8809800000  |
| H | -1.0736950000 | -18.4532300000 | -0.8809800000 |
| H | 1.0755020000  | -17.1473850000 | -0.8744750000 |
| H | 1.0755020000  | -17.1473850000 | 0.8744750000  |
| H | -1.0773490000 | -15.8792000000 | -0.8750010000 |
| H | -1.0773490000 | -15.8792000000 | 0.8750010000  |
| H | 1.0770430000  | -14.6081120000 | -0.8750390000 |
| H | 1.0770430000  | -14.6081120000 | 0.8750390000  |
| H | -1.0771880000 | -13.3377900000 | -0.8750010000 |
| H | -1.0771880000 | -13.3377900000 | 0.8750010000  |
| H | 1.0771590000  | -12.0676100000 | -0.8750060000 |
| H | 1.0771590000  | -12.0676100000 | 0.8750060000  |
| H | -1.0771080000 | -10.7972900000 | -0.8750020000 |
| H | -1.0771080000 | -10.7972900000 | 0.8750020000  |
| H | 1.0772140000  | -9.5270590000  | -0.8750020000 |
| H | 1.0772140000  | -9.5270590000  | 0.8750020000  |
| H | -1.0770730000 | -8.2567680000  | -0.8750000000 |
| H | -1.0770730000 | -8.2567680000  | 0.8750000000  |
| H | 1.0772320000  | -6.9865030000  | -0.8750010000 |
| H | 1.0772320000  | -6.9865030000  | 0.8750010000  |
| H | -1.0770720000 | -5.7162370000  | -0.8750000000 |
| H | -1.0770720000 | -5.7162370000  | 0.8750000000  |
| H | 1.0772180000  | -4.4459460000  | -0.8750000000 |
| H | 1.0772180000  | -4.4459460000  | 0.8750000000  |
| H | -1.0770980000 | -3.1757000000  | -0.8750000000 |
| H | -1.0770980000 | -3.1757000000  | 0.8750000000  |
| H | 1.0771830000  | -1.9053930000  | -0.8750000000 |
| H | 1.0771830000  | -1.9053930000  | 0.8750000000  |
| H | -1.0771390000 | -0.6351560000  | -0.8750000000 |
| H | -1.0771390000 | -0.6351560000  | 0.8750000000  |
| H | 1.0771390000  | 0.6351560000   | -0.8750000000 |
| H | 1.0771390000  | 0.6351560000   | 0.8750000000  |
| H | -1.0771830000 | 1.9053930000   | -0.8750000000 |
| H | -1.0771830000 | 1.9053930000   | 0.8750000000  |
| H | 1.0770980000  | 3.1757000000   | -0.8750000000 |
| H | 1.0770980000  | 3.1757000000   | 0.8750000000  |
| H | -1.0772180000 | 4.4459460000   | -0.8750000000 |
| H | -1.0772180000 | 4.4459460000   | 0.8750000000  |
| H | 1.0770720000  | 5.7162370000   | -0.8750000000 |
| H | 1.0770720000  | 5.7162370000   | 0.8750000000  |
| H | -1.0772320000 | 6.9865030000   | -0.8750010000 |
| H | -1.0772320000 | 6.9865030000   | 0.8750010000  |
| H | 1.0770730000  | 8.2567680000   | -0.8750000000 |
| H | 1.0770730000  | 8.2567680000   | 0.8750000000  |
| H | -1.0772140000 | 9.5270590000   | -0.8750020000 |
| H | -1.0772140000 | 9.5270590000   | 0.8750020000  |
| H | 1.0771080000  | 10.7972900000  | -0.8750020000 |

|   |               |               |               |
|---|---------------|---------------|---------------|
| H | 1.0771080000  | 10.7972900000 | 0.8750020000  |
| H | -1.0771590000 | 12.0676100000 | -0.8750060000 |
| H | -1.0771590000 | 12.0676100000 | 0.8750060000  |
| H | 1.0771880000  | 13.3377900000 | -0.8750010000 |
| H | 1.0771880000  | 13.3377900000 | 0.8750010000  |
| H | -1.0770430000 | 14.6081120000 | -0.8750390000 |
| H | -1.0770430000 | 14.6081120000 | 0.8750390000  |
| H | 1.0773490000  | 15.8792000000 | -0.8750010000 |
| H | 1.0773490000  | 15.8792000000 | 0.8750010000  |
| H | -1.0755020000 | 17.1473850000 | -0.8744750000 |
| H | -1.0755020000 | 17.1473850000 | 0.8744750000  |
| H | 1.0736950000  | 18.4532300000 | -0.8809800000 |
| H | -0.1903530000 | 19.3119650000 | 0.0000000000  |
| H | 1.0736950000  | 18.4532300000 | 0.8809800000  |

|   |               |               |               |
|---|---------------|---------------|---------------|
| C | 2.0005820000  | -0.4217150000 | -5.1586380000 |
| C | 1.6325990000  | 0.3400300000  | -6.4204530000 |
| C | 1.5275770000  | -0.5413390000 | -7.6605250000 |
| C | 0.7599670000  | 0.0889650000  | -8.8233420000 |
| C | -0.7599670000 | -0.0889650000 | -8.8233420000 |
| C | -1.5275770000 | 0.5413390000  | -7.6605250000 |
| C | -1.6325990000 | -0.3400300000 | -6.4204530000 |
| C | -2.0005820000 | 0.4217150000  | -5.1586380000 |
| C | -1.9179500000 | -0.4266210000 | -3.9009180000 |
| C | -2.1130280000 | 0.3643820000  | -2.6192990000 |
| C | -1.9289450000 | -0.4683610000 | -1.3625820000 |
| C | -2.0835260000 | 0.3297610000  | -0.0799790000 |
| C | -1.8868370000 | -0.4993400000 | 1.1770580000  |
| C | -2.0506040000 | 0.2987710000  | 2.4586040000  |
| C | -1.8627820000 | -0.5300730000 | 3.7171180000  |
| C | 1.9179500000  | 0.4266210000  | -3.9009180000 |
| C | 2.1130280000  | -0.3643820000 | -2.6192990000 |
| C | 1.9289450000  | 0.4683610000  | -1.3625820000 |
| C | 2.0835260000  | -0.3297610000 | -0.0799790000 |
| C | 1.8868370000  | 0.4993400000  | 1.1770580000  |
| C | 2.0506040000  | -0.2987710000 | 2.4586040000  |
| C | 1.8627820000  | 0.5300730000  | 3.7171180000  |
| C | 2.0389310000  | -0.2670600000 | 4.9976940000  |
| C | 1.8580810000  | 0.5619880000  | 6.2570120000  |
| C | -2.0389310000 | 0.2670600000  | 4.9976940000  |
| C | -1.8580810000 | -0.5619880000 | 6.2570120000  |
| C | -2.0344020000 | 0.2353470000  | 7.5381520000  |
| C | 2.0344020000  | -0.2353470000 | 7.5381520000  |
| C | 1.8580810000  | 0.6044690000  | 8.7908300000  |
| C | -1.8580810000 | -0.6044690000 | 8.7908300000  |
| H | 3.0032970000  | -0.8536840000 | -5.2555180000 |
| H | 1.3184040000  | -1.2742760000 | -5.0520780000 |
| H | 0.6835160000  | 0.8516790000  | -6.2469780000 |
| H | 2.3634560000  | 1.1354880000  | -6.6037860000 |
| H | 1.0561040000  | -1.4944750000 | -7.3951110000 |
| H | 2.5388810000  | -0.7990180000 | -7.9904610000 |
| H | 0.9933180000  | 1.1596960000  | -8.8662740000 |
| H | 1.1330780000  | -0.3333140000 | -9.7612130000 |
| H | -0.9933180000 | -1.1596960000 | -8.8662740000 |
| H | -1.1330780000 | 0.3333140000  | -9.7612130000 |
| H | -1.0561040000 | 1.4944750000  | -7.3951110000 |
| H | -2.5388810000 | 0.7990180000  | -7.9904610000 |
| H | -0.6835160000 | -0.8516790000 | -6.2469780000 |
| H | -2.3634560000 | -1.1354880000 | -6.6037860000 |
| H | -1.3184040000 | 1.2742760000  | -5.0520780000 |
| H | -3.0032970000 | 0.8536840000  | -5.2555180000 |
| H | -0.9361970000 | -0.9138230000 | -3.8692860000 |
| H | -2.6535790000 | -1.2376700000 | -3.9500800000 |
| H | -1.4014140000 | 1.1989340000  | -2.6034340000 |
| H | -3.1098490000 | 0.8205540000  | -2.6144440000 |
| H | -0.9354220000 | -0.9317280000 | -1.3815170000 |
| H | -2.6469390000 | -1.2968550000 | -1.3645980000 |
| H | -1.3664430000 | 1.1595740000  | -0.0822890000 |
| H | -3.0770680000 | 0.7928870000  | -0.0573660000 |
| H | -0.8899490000 | -0.9548250000 | 1.1582250000  |
| H | -2.5983590000 | -1.3334780000 | 1.1763710000  |
| H | -1.3357380000 | 1.1303640000  | 2.4617060000  |
| H | -3.0454000000 | 0.7595900000  | 2.4735460000  |
| H | -0.8651030000 | -0.9837850000 | 3.7068870000  |
| H | -2.5727550000 | -1.3654970000 | 3.7099110000  |
| H | 2.6535790000  | 1.2376700000  | -3.9500800000 |
| H | 0.9361970000  | 0.9138230000  | -3.8692860000 |
| H | 3.1098490000  | -0.8205540000 | -2.6144440000 |
| H | 1.4014140000  | -1.1989340000 | -2.6034340000 |
| H | 2.6469390000  | 1.2968550000  | -1.3645980000 |
| H | 0.9354220000  | 0.9317280000  | -1.3815170000 |
| H | 3.0770680000  | -0.7928870000 | -0.0573660000 |
| H | 1.3664430000  | -1.1595740000 | -0.0822890000 |
| H | 2.5983590000  | 1.3334780000  | 1.1763710000  |
| H | 0.8899490000  | 0.9548250000  | 1.1582250000  |
| H | 3.0454000000  | -0.7595900000 | 2.4735460000  |
| H | 1.3357380000  | -1.1303640000 | 2.4617060000  |
| H | 2.5727550000  | 1.3654970000  | 3.7099110000  |
| H | 0.8651030000  | 0.9837850000  | 3.7068870000  |
| H | 3.0350660000  | -0.7251840000 | 5.0051940000  |
| H | 1.3263640000  | -1.1005390000 | 5.0066070000  |
| H | 2.5707010000  | 1.3953360000  | 6.2485270000  |
| H | 0.8618580000  | 1.0192970000  | 6.2504360000  |

|   |               |               |              |
|---|---------------|---------------|--------------|
| H | -3.0350660000 | 0.7251840000  | 5.0051940000 |
| H | -1.3263640000 | 1.1005390000  | 5.0066070000 |
| H | -2.5707010000 | -1.3953360000 | 6.2485270000 |
| H | -0.8618580000 | -1.0192970000 | 6.2504360000 |
| H | -3.0276770000 | 0.6971710000  | 7.5403930000 |
| H | -1.3185300000 | 1.0646140000  | 7.5457190000 |
| H | 1.3185300000  | -1.0646140000 | 7.5457190000 |
| H | 3.0276770000  | -0.6971710000 | 7.5403930000 |
| H | 0.8629040000  | 1.0542710000  | 8.8258290000 |
| H | 1.9835860000  | 0.0091390000  | 9.6972530000 |
| H | 2.5872850000  | 1.4178850000  | 8.8234430000 |
| H | -2.5872850000 | -1.4178850000 | 8.8234430000 |
| H | -0.8629040000 | -1.0542710000 | 8.8258290000 |
| H | -1.9835860000 | -0.0091390000 | 9.6972530000 |
